# Supplementary material for: Student, instructor, and observer agreement regarding frequencies of scientific teaching practices using the Measurement Instrument for Scientific Teaching-Observable (MISTO)
Source: Int J STEM Educ. 2018 Aug 16;5(1):31. doi: 10.1186/s40594-018-0128-1 (PMC6310438; doi:10.1186/s40594-018-0128-1)
Supplement: Supplementary file 6 — MISTO Qualtrics file. This qsf file contains the MISTO survey, which can be administered to students or instructors using the online Qualtrics platform. This version of the survey should only be used when asking students or instructors to reflect on a one week sample of class sessions or when comparing these perspectives to observers. For other purposes, we recommend using the original MIST survey qsf file, which is available in the supplement of the original publication (Durham et al. 2017). (QSF 134 kb) [file 40594_2018_128_MOESM6_ESM.qsf]

{"SurveyEntry":{"SurveyID":"SV_bdByXydulCoImrP","SurveyName":"MISTO general template","SurveyDescription":"Scientific Teaching Practices for Students Standard template","SurveyOwnerID":"UR_5pSPzRK73SYAtMh","SurveyBrandID":"ssp","DivisionID":null,"SurveyLanguage":"EN","SurveyActiveResponseSet":"RS_0eJF48fdB8n35TT","SurveyStatus":"Inactive","SurveyStartDate":"0000-00-00 00:00:00","SurveyExpirationDate":"0000-00-00 00:00:00","SurveyCreationDate":"2018-06-28 08:36:23","CreatorID":"UR_5pSPzRK73SYAtMh","LastModified":"2018-06-28 16:07:41","LastAccessed":"0000-00-00 00:00:00","LastActivated":"0000-00-00 00:00:00","Deleted":null},"SurveyElements":[{"SurveyID":"SV_bdByXydulCoImrP","Element":"BL","PrimaryAttribute":"Survey Blocks","SecondaryAttribute":null,"TertiaryAttribute":null,"Payload":{"1":{"Type":"Trash","Description":"Trash \/ Unused Questions","ID":"BL_73NOaAx8JIdhrZr","BlockElements":[{"Type":"Question","QuestionID":"QID131"},{"Type":"Question","QuestionID":"QID12"},{"Type":"Question","QuestionID":"QID14"},{"Type":"Question","QuestionID":"QID106"},{"Type":"Question","QuestionID":"QID130"},{"Type":"Question","QuestionID":"QID9"},{"Type":"Question","QuestionID":"QID107"},{"Type":"Question","QuestionID":"QID108"},{"Type":"Question","QuestionID":"QID104"},{"Type":"Question","QuestionID":"QID110"},{"Type":"Question","QuestionID":"QID16"},{"Type":"Question","QuestionID":"QID142"},{"Type":"Question","QuestionID":"QID138"},{"Type":"Question","QuestionID":"QID26"},{"Type":"Question","QuestionID":"QID25"},{"Type":"Question","QuestionID":"QID184"}]},"2":{"Type":"Standard","SubType":"","Description":"Polling methods","ID":"BL_8qq5qPoDOM9bCDj","BlockElements":[{"Type":"Question","QuestionID":"QID128"},{"Type":"Question","QuestionID":"QID3","SkipLogic":[{"SkipLogicID":1,"ChoiceLocator":"q:\/\/QID3\/SelectableChoice\/1","Condition":"Selected","SkipToDestination":"ENDOFBLOCK","Locator":"q:\/\/QID3\/SelectableChoice\/1","SkipToDescription":"<p><em><span style=\"font-si... <strong>zero questions<\/strong>  <strong>Is Selected<\/strong>","Description":"Condition: <strong title=\"zero questions\">zero questions<\/strong> <strong>Is Selected<\/strong>. Skip To: <strong>End of Block<\/strong>.","QuestionID":"QID3"}]},{"Type":"Question","QuestionID":"QID105"}],"Options":{"BlockLocking":"false","RandomizeQuestions":"false","BlockVisibility":"Expanded"}},"3":{"Type":"Standard","SubType":"","Description":"In-Class Activities","ID":"BL_d70uHVADPpNxXtX","BlockElements":[{"Type":"Question","QuestionID":"QID129"},{"Type":"Question","QuestionID":"QID6","SkipLogic":[{"SkipLogicID":2,"ChoiceLocator":"q:\/\/QID6\/SelectableChoice\/1","Condition":"Selected","SkipToDestination":"ENDOFBLOCK","Locator":"q:\/\/QID6\/SelectableChoice\/1","SkipToDescription":"<p><span style=\"font-size: ... <strong>zero times<\/strong>  <strong>Is Selected<\/strong>","Description":"Condition: <strong title=\"zero times\">zero times<\/strong> <strong>Is Selected<\/strong>. Skip To: <strong>End of Block<\/strong>.","QuestionID":"QID6"}]},{"Type":"Question","QuestionID":"QID109"}],"Options":{"BlockLocking":"false","RandomizeQuestions":"false","BlockVisibility":"Expanded"}},"6":{"Type":"Standard","SubType":"","Description":"Student-Student Interactions","ID":"BL_ex7ziJSzFTsaXcN","BlockElements":[{"Type":"Question","QuestionID":"QID132"},{"Type":"Question","QuestionID":"QID55","SkipLogic":[{"SkipLogicID":5,"ChoiceLocator":"q:\/\/QID55\/SelectableChoice\/2","Condition":"Selected","SkipToDestination":"QID20","Locator":"q:\/\/QID55\/SelectableChoice\/2","SkipToDescription":"<span style=\"font-size: 16p... <strong>No<\/strong> Is <strong>Selected<\/strong>","Description":"If <strong title=\"No\">No<\/strong> Is <strong>Selected<\/strong>, Then Skip To <strong>Students were asked to provide some s...<\/strong>","QuestionID":"QID55"}]},{"Type":"Question","QuestionID":"QID111"},{"Type":"Page Break"},{"Type":"Question","QuestionID":"QID133"},{"Type":"Question","QuestionID":"QID15"},{"Type":"Page Break"},{"Type":"Question","QuestionID":"QID134"},{"Type":"Question","QuestionID":"QID18"},{"Type":"Question","QuestionID":"QID19"},{"Type":"Page Break"},{"Type":"Question","QuestionID":"QID135"},{"Type":"Question","QuestionID":"QID20"}],"Options":{"BlockLocking":"false","RandomizeQuestions":"false","BlockVisibility":"Expanded"}},"7":{"Type":"Standard","SubType":"","Description":"Inclusivity","ID":"BL_3sEEC6Xt9tqDOct","BlockElements":[{"Type":"Question","QuestionID":"QID136"},{"Type":"Question","QuestionID":"QID21"},{"Type":"Page Break"},{"Type":"Question","QuestionID":"QID137"},{"Type":"Question","QuestionID":"QID103"},{"Type":"Question","QuestionID":"QID23"},{"Type":"Question","QuestionID":"QID24"}],"Options":{"BlockLocking":"false","RandomizeQuestions":"false","BlockVisibility":"Expanded"}},"8":{"Type":"Standard","SubType":"","Description":"Student Influence on Course Structure","ID":"BL_0wYWfRI6fKgpOuh","BlockElements":[{"Type":"Question","QuestionID":"QID140"},{"Type":"Question","QuestionID":"QID27"},{"Type":"Page Break"},{"Type":"Question","QuestionID":"QID185"},{"Type":"Question","QuestionID":"QID29"},{"Type":"Question","QuestionID":"QID30"}],"Options":{"BlockLocking":"false","RandomizeQuestions":"false","BlockVisibility":"Expanded"}},"9":{"Type":"Standard","SubType":"","Description":"Student Participation & Science Practices","ID":"BL_7QA9uJPk6rIqU1D","BlockElements":[{"Type":"Question","QuestionID":"QID56"},{"Type":"Question","QuestionID":"QID32"},{"Type":"Question","QuestionID":"QID34"},{"Type":"Question","QuestionID":"QID33"},{"Type":"Page Break"},{"Type":"Question","QuestionID":"QID114"},{"Type":"Question","QuestionID":"QID35"},{"Type":"Question","QuestionID":"QID36"},{"Type":"Page Break"},{"Type":"Question","QuestionID":"QID116"},{"Type":"Question","QuestionID":"QID37"},{"Type":"Question","QuestionID":"QID38"},{"Type":"Page Break"},{"Type":"Question","QuestionID":"QID115"},{"Type":"Question","QuestionID":"QID39"},{"Type":"Page Break"},{"Type":"Question","QuestionID":"QID117"},{"Type":"Question","QuestionID":"QID40"},{"Type":"Question","QuestionID":"QID41"},{"Type":"Page Break"},{"Type":"Question","QuestionID":"QID118"},{"Type":"Question","QuestionID":"QID22"},{"Type":"Question","QuestionID":"QID42"}],"Options":{"BlockLocking":"false","RandomizeQuestions":"false","BlockVisibility":"Expanded"}},"10":{"Type":"Standard","SubType":"","Description":"Student Cognitive Engagement","ID":"BL_esPngbB18H2He4Z","BlockElements":[{"Type":"Question","QuestionID":"QID119"},{"Type":"Question","QuestionID":"QID44"},{"Type":"Question","QuestionID":"QID46"},{"Type":"Page Break"},{"Type":"Question","QuestionID":"QID120"},{"Type":"Question","QuestionID":"QID43"},{"Type":"Question","QuestionID":"QID45"},{"Type":"Page Break"},{"Type":"Question","QuestionID":"QID121"},{"Type":"Question","QuestionID":"QID48"},{"Type":"Question","QuestionID":"QID47"}],"Options":{"BlockLocking":"false","RandomizeQuestions":"false","BlockVisibility":"Expanded"}},"11":{"Type":"Standard","SubType":"","Description":"Comments Box","ID":"BL_8G4umwJjSD2j8mV","BlockElements":[{"Type":"Question","QuestionID":"QID102"}],"Options":{"BlockLocking":"false","RandomizeQuestions":"false","BlockVisibility":"Collapsed"}},"14":{"Type":"Standard","SubType":"","Description":"Learning Goals","ID":"BL_5zixcdthwC3uJ6Z","BlockElements":[{"Type":"Question","QuestionID":"QID101"},{"Type":"Question","QuestionID":"QID1"},{"Type":"Question","QuestionID":"QID2"}],"Options":{"BlockLocking":"false","RandomizeQuestions":"false","BlockVisibility":"Expanded"}},"16":{"Type":"Standard","SubType":"","Description":"Intro","ID":"BL_0UHSWihfP0dssEl","BlockElements":[{"Type":"Question","QuestionID":"QID183"},{"Type":"Question","QuestionID":"QID57"}],"Options":{"BlockLocking":"false","RandomizeQuestions":"false","BlockVisibility":"Collapsed"}}}},{"SurveyID":"SV_bdByXydulCoImrP","Element":"FL","PrimaryAttribute":"Survey Flow","SecondaryAttribute":null,"TertiaryAttribute":null,"Payload":{"Type":"Root","FlowID":"FL_1","Flow":[{"Type":"Standard","ID":"BL_0UHSWihfP0dssEl","FlowID":"FL_18"},{"Type":"Standard","ID":"BL_5zixcdthwC3uJ6Z","FlowID":"FL_16"},{"Type":"Standard","ID":"BL_8qq5qPoDOM9bCDj","FlowID":"FL_3"},{"Type":"Standard","ID":"BL_d70uHVADPpNxXtX","FlowID":"FL_4"},{"Type":"Standard","ID":"BL_ex7ziJSzFTsaXcN","FlowID":"FL_7"},{"Type":"Standard","ID":"BL_3sEEC6Xt9tqDOct","FlowID":"FL_8"},{"Type":"Standard","ID":"BL_0wYWfRI6fKgpOuh","FlowID":"FL_9"},{"Type":"Standard","ID":"BL_7QA9uJPk6rIqU1D","FlowID":"FL_10"},{"Type":"Standard","ID":"BL_esPngbB18H2He4Z","FlowID":"FL_11"},{"Type":"Standard","ID":"BL_8G4umwJjSD2j8mV","FlowID":"FL_13"}],"Properties":{"Count":19}}},{"SurveyID":"SV_bdByXydulCoImrP","Element":"SO","PrimaryAttribute":"Survey Options","SecondaryAttribute":null,"TertiaryAttribute":null,"Payload":{"BackButton":"true","SaveAndContinue":"true","SurveyProtection":"PublicSurvey","BallotBoxStuffingPrevention":"false","NoIndex":"Yes","SurveyExpiration":null,"SurveyTermination":"DefaultMessage","Header":"","Footer":"","ProgressBarDisplay":"VerboseText","PartialData":"+1 month","ValidationMessage":null,"PreviousButton":"  <<  ","NextButton":"  >>  ","SkinLibrary":"Qualtrics","SkinType":"MQ","Skin":"v4qualtrics1","NewScoring":1,"PreferJFE":true,"libraryId":"","nextButtonMid":"","previousButtonMid":"","headerMid":"","footerMid":"","QuestionsPerPage":"","PageTransition":"None","ExternalCSS":null,"CustomStyles":{"errorStyles":{"selector":".Skin .ValidationError","styles":{"color":"rgb(231, 63, 97)","backgroundColor":"transparent","borderColor":"transparent"}},"errorStylesBG":{"selector":".Skin .HeaderValidationError, .Skin .HeaderValidationError li a","styles":{"color":"rgb(0,0,0)","backgroundColor":"rgb(231, 63, 97)"}},"pageStyles":{"selector":"#SurveyEngineBody","styles":{"backgroundColor":"rgb(41, 134, 149)"}},"textStyles":{"selector":".SkinInner","styles":{"fontFamily":"arial, helvetica, sans-serif","fontSize":"80%","fontWeight":null,"fontStyle":null,"textDecoration":null,"color":null}},"questionStyles":{"selector":".Skin .QuestionText","styles":{"fontFamily":null,"fontSize":null,"fontWeight":null,"fontStyle":null,"textDecoration":null,"color":null}},"choiceStyles":{"selector":".Skin .horizontalbar th.ylabel, .Skin .Matrix table td, .Skin .Matrix table th, .Skin .Matrix table thead th, .Skin .Matrix table thead td, .Skin .PGR .DragAndDrop .Items label, .Skin .QuestionBody ul.ChoiceStructure, .Skin .PGR .DragAndDrop .Group ul, .Skin .PGR .DragAndDrop .Group h2, .Skin .PGR .DragAndDrop .Items ul, .Skin .PGR .DragAndDrop .Items h2, .Skin .DD .QuestionBody table.ChoiceStructure, .Skin .PGR .DragAndDrop .NoColumns td.groupsContainerTd div ul, .Skin .PGR .DragAndDrop .NoColumns td.groupsContainerTd div h2, .Skin .SBS thead th, .Skin .SBS td, .Skin .SBS .Answers td, .Skin .SBS .Answers th, .SBS table.ChoiceStructure, .Skin .horizontalbar thead table.LabelDescriptions tr td, .Skin .horizontalbar thead tr td.NotApplicable, .QuestionBody th, .Skin .QuestionBody .MC .MAVR label, .Skin .QuestionBody .MC .SAVR label, .Skin .SBS thead th, .Skin .SBS td, .Skin .RO .DND ul li, .Skin .reg, .SkinInner .ChoiceStructure, .Skin thead, .Skin .GAP .ChoiceStructure thead th, .Skin .GAP .ChoiceStructure .c4, .Skin .GAP .ChoiceStructure th, .Skin .GAP .ChoiceStructure .WhyText, .SkinInner .ChoiceStructure .LightBG, .Skin .QuestionOuter.Highlight .Inner .reg, .Skin .QuestionOuter.Highlight .Inner .alt, .Skin .QuestionOuter.Highlight .Inner .ReadableAlt       ","styles":{"fontFamily":null,"fontSize":null,"fontWeight":null,"fontStyle":null,"textDecoration":null,"color":null}},"headerStyles":{"selector":".Skin div#Header","styles":{"color":null}},"footerStyles":{"selector":".Skin #Footer","styles":{"color":null}},"questionSeparatorStyles":{"selector":".Skin .Separator","styles":{"backgroundColor":null,"display":"block"}},"highlightStyles":{"selector":".Skin .QuestionOuter.Highlight .Inner, .Skin .QuestionOuter.Highlight .Inner .reg, .Skin .QuestionOuter.Highlight .Inner .alt, .Skin .QuestionOuter.Highlight .Inner .ReadableAlt","styles":{"backgroundColor":null}},"highlightStylesAlt":{"selector":".Skin .QuestionOuter.Highlight .Inner .ReadableAlt, .Skin .QuestionOuter.Highlight .Inner .LightBG","styles":{"backgroundColor":null}},"textEntryStyles":{"selector":".Skin select, .Skin .InputText","styles":{"color":null}},"borderStyles":{"selector":".Skin .CS .horizontalbar table.sliderGrid tr.xlabel th, .Skin .CS .horizontalbar .ylabel, .Skin .CS .horizontalbar table.sliderGrid tr td.value, .Skin .Slider .horizontalbar table.sliderGrid tr.xlabel th, .Skin .BorderColor, .Skin .DarkBorderColor, .Skin .Slider .horizontalbar table.sliderGrid tr td.value, .Skin thead, .Skin .GAP .ChoiceStructure thead th  ","styles":{"borderColor":null}},"altRowStyles":{"selector":".Skin .ReadableAlt, .Skin .LightBG","styles":{"backgroundColor":null}},"customCSS":null},"HighlightQuestions":"off","EOSMessage":"","ShowExportTags":"false","CollectGeoLocation":"false","SurveyTitle":"Online Survey Software | Qualtrics Survey Solutions","SurveyMetaDescription":"Qualtrics sophisticated online survey software solutions make creating online surveys easy. Learn more about Research Suite and get a free account today.","PasswordProtection":"No","AnonymizeResponse":"No","Password":"","RefererCheck":"No","RefererURL":"http:\/\/","EOSMessageLibrary":"","EOSRedirectURL":"http:\/\/","EmailThankYou":"false","ThankYouEmailMessageLibrary":null,"ThankYouEmailMessage":null,"ValidateMessage":"false","ValidationMessageLibrary":null,"InactiveSurvey":"DefaultMessage","InactiveMessageLibrary":"","InactiveMessage":"","AvailableLanguages":{"EN":[]},"ProtectSelectionIds":true}},{"SurveyID":"SV_bdByXydulCoImrP","Element":"SCO","PrimaryAttribute":"Scoring","SecondaryAttribute":null,"TertiaryAttribute":null,"Payload":{"ScoringCategories":[],"ScoringCategoryGroups":[],"ScoringSummaryCategory":null,"ScoringSummaryAfterQuestions":0,"ScoringSummaryAfterSurvey":0,"DefaultScoringCategory":null,"AutoScoringCategory":null}},{"SurveyID":"SV_bdByXydulCoImrP","Element":"STAT","PrimaryAttribute":"Survey Statistics","SecondaryAttribute":null,"TertiaryAttribute":null,"Payload":{"MobileCompatible":true,"ID":"Survey Statistics"}},{"SurveyID":"SV_bdByXydulCoImrP","Element":"PROJ","PrimaryAttribute":"CORE","SecondaryAttribute":"1.0.0","TertiaryAttribute":null,"Payload":null},{"SurveyID":"SV_bdByXydulCoImrP","Element":"QC","PrimaryAttribute":"Survey Question Count","SecondaryAttribute":"185","TertiaryAttribute":null,"Payload":null},{"SurveyID":"SV_bdByXydulCoImrP","Element":"SQ","PrimaryAttribute":"QID19","SecondaryAttribute":"At least some students were asked to\u00a0verbally share the results of any group work or\u00a0group discus.","TertiaryAttribute":null,"Payload":{"QuestionText":"<span style=\"font-size: 16px;\">At least some students were asked to&nbsp;verbally share the results of any group work or&nbsp;group discussions&nbsp;with the whole class approximately:<\/span>","DefaultChoices":false,"DataExportTag":"Q11","QuestionType":"MC","Selector":"SAHR","SubSelector":"TX","Configuration":{"QuestionDescriptionOption":"UseText","LabelPosition":"BELOW"},"QuestionDescription":"At least some students were asked to\u00a0verbally share the results of any group work or\u00a0group discus...","Choices":[],"ChoiceOrder":[],"Validation":{"Settings":{"ForceResponse":"OFF","ForceResponseType":"ON","Type":"None"}},"GradingData":[],"Language":[],"QuestionID":"QID19","DynamicChoices":{"DynamicType":"ChoiceGroup","Locator":"q:\/\/QID15\/ChoiceGroup\/AllChoices?displayLogic=0","Type":"Dynamic","Description":"Displayed Choices"},"DynamicChoicesData":[],"RecodeValues":{"x1":"0","x5":"1","x6":"2","x7":"3"},"DataVisibility":{"Private":false,"Hidden":false},"NextChoiceId":1,"NextAnswerId":1}},{"SurveyID":"SV_bdByXydulCoImrP","Element":"SQ","PrimaryAttribute":"QID184","SecondaryAttribute":"Click to write the question text","TertiaryAttribute":null,"Payload":{"QuestionText":"Click to write the question text","DataExportTag":"Q75","QuestionType":"MC","Selector":"SAVR","SubSelector":"TX","Configuration":{"QuestionDescriptionOption":"UseText"},"QuestionDescription":"Click to write the question text","Choices":{"1":{"Display":"Click to write Choice 1"},"2":{"Display":"Click to write Choice 2"},"3":{"Display":"Click to write Choice 3"}},"ChoiceOrder":["1","2","3"],"Validation":{"Settings":{"ForceResponse":"OFF","ForceResponseType":"ON","Type":"None"}},"Language":[],"NextChoiceId":4,"NextAnswerId":1,"QuestionID":"QID184"}},{"SurveyID":"SV_bdByXydulCoImrP","Element":"RS","PrimaryAttribute":"RS_0eJF48fdB8n35TT","SecondaryAttribute":"Default Response Set","TertiaryAttribute":null,"Payload":null},{"SurveyID":"SV_bdByXydulCoImrP","Element":"SQ","PrimaryAttribute":"QID103","SecondaryAttribute":"Diversity includes differences in race, ethnicity, culture, background, religion, affiliation, ag...","TertiaryAttribute":null,"Payload":{"QuestionText":"<span style=\"font-size:16px;\"><em>Diversity includes differences in race, ethnicity, culture, background, religion, affiliation, age, gender, orientation, course performance, personality type, etc.<\/em><\/span>","DefaultChoices":false,"DataExportTag":"Pg12.3","QuestionType":"DB","Selector":"TB","Configuration":{"QuestionDescriptionOption":"UseText"},"QuestionDescription":"Diversity includes differences in race, ethnicity, culture, background, religion, affiliation, ag...","ChoiceOrder":[],"Validation":{"Settings":{"Type":"None"}},"GradingData":[],"Language":[],"QuestionID":"QID103"}},{"SurveyID":"SV_bdByXydulCoImrP","Element":"SQ","PrimaryAttribute":"QID23","SecondaryAttribute":"Examples\u00a0or analogies\u00a0used in this course included a diversity of people and cultures.","TertiaryAttribute":null,"Payload":{"QuestionText":"<span style=\"font-size: 16px;\"><span style=\"font-family: arial,helvetica,sans-serif;\">Examples&nbsp;or analogies&nbsp;used in this course included a diversity of people and cultures.<\/span><\/span>","DefaultChoices":false,"DataExportTag":"Q14","QuestionID":"QID23","QuestionType":"MC","Selector":"SAHR","SubSelector":"TX","Configuration":{"QuestionDescriptionOption":"UseText","LabelPosition":"BELOW"},"QuestionDescription":"Examples\u00a0or analogies\u00a0used in this course included a diversity of people and cultures.","Choices":{"7":{"Display":"<span style=\"font-size: 13px;\">humans were not discussed in this course<\/span>"},"8":{"Display":"<span style=\"font-size: 13px;\">strongly disagree<\/span>"},"9":{"Display":"<span style=\"font-size: 13px;\">disagree<\/span>"},"10":{"Display":"<span style=\"font-size: 13px;\">somewhat disagree<\/span>"},"11":{"Display":"<span style=\"font-size: 13px;\">somewhat agree<\/span>"},"12":{"Display":"<span style=\"font-size: 13px;\">agree<\/span>"},"13":{"Display":"<span style=\"font-size: 13px;\">strongly agree<\/span>"}},"ChoiceOrder":["7","8","9","10","11","12","13"],"Validation":{"Settings":{"ForceResponse":"OFF","ForceResponseType":"ON","Type":"None"}},"GradingData":[],"Language":[],"RecodeValues":{"7":"0","8":"1","9":"2","10":"3","11":"4","12":"5","13":"6"},"DataVisibility":{"Private":false,"Hidden":false},"NextChoiceId":14,"NextAnswerId":1}},{"SurveyID":"SV_bdByXydulCoImrP","Element":"SQ","PrimaryAttribute":"QID42","SecondaryAttribute":"Historical context was used to recognize why certain discoveries or advancements changed the way...","TertiaryAttribute":null,"Payload":{"QuestionText":"<span style=\"font-size: 16px;\">Historical context was used to recognize why certain discoveries or advancements changed the way people viewed related scientific principles approximately:<\/span>","DefaultChoices":false,"DataExportTag":"Q30","QuestionID":"QID42","QuestionType":"MC","Selector":"SAHR","SubSelector":"TX","Configuration":{"QuestionDescriptionOption":"UseText","LabelPosition":"BELOW"},"QuestionDescription":"Historical context was used to recognize why certain discoveries or advancements changed the way...","Choices":[],"DynamicChoices":{"DynamicType":"ChoiceGroup","Locator":"q:\/\/QID15\/ChoiceGroup\/AllChoices?displayLogic=0","Type":"Dynamic","Description":"All Choices - Displayed & Hidden"},"DynamicChoicesData":[],"ChoiceOrder":[],"Validation":{"Settings":{"ForceResponse":"OFF","ForceResponseType":"ON","Type":"None"}},"GradingData":[],"Language":[],"RecodeValues":{"x1":"0","x5":"1","x6":"2","x7":"3"},"DataVisibility":{"Private":false,"Hidden":false},"NextChoiceId":1,"NextAnswerId":1}},{"SurveyID":"SV_bdByXydulCoImrP","Element":"SQ","PrimaryAttribute":"QID6","SecondaryAttribute":"In-class activities other than polling\u00a0questions\u00a0include any exercise or activity in which the st.","TertiaryAttribute":null,"Payload":{"QuestionText":"<p><span style=\"font-size: 16px;\"><em><strong>In-class activities<\/strong> <u>other than polling&nbsp;questions<\/u>&nbsp;include any exercise or activity in which the students are not listening to a lecture&nbsp;during class, such as student discussions, worksheets, problem sets, case studies, hands-on demonstrations, role plays, concept maps, one-minute essays, think-pair-shares, inquiry-based activities,&nbsp;low point value quizzes, and other related activities.<\/em><\/span><\/p>\n\n<p>&nbsp;<\/p>\n\n<p><span style=\"font-size: 16px;\">Students were asked to complete <strong>in-class activities<\/strong>&nbsp;approximately:<\/span><\/p>","DefaultChoices":false,"DataExportTag":"Q5","QuestionType":"MC","Selector":"SAHR","SubSelector":"TX","Configuration":{"QuestionDescriptionOption":"UseText","LabelPosition":"BELOW"},"QuestionDescription":"In-class activities other than polling\u00a0questions\u00a0include any exercise or activity in which the st...","Choices":{"1":{"Display":"<span style=\"font-size: 13px;\">zero times<\/span>"},"4":{"Display":"<span style=\"font-size: 13px;\">1 activity<br>per week<\/span>"},"5":{"Display":"<span style=\"font-size: 13px;\">2-3 activities<br>per week<\/span>"},"6":{"Display":"<span style=\"font-size: 13px;\">4-5 activities<br>per week<\/span>"},"7":{"Display":"<span style=\"font-size: 13px;\">more than 5 activities<br>per week<\/span>"}},"ChoiceOrder":[1,4,5,6,7],"Validation":{"Settings":{"ForceResponse":"OFF","ForceResponseType":"ON","Type":"None"}},"GradingData":[],"Language":[],"QuestionID":"QID6","RecodeValues":{"1":"0","4":"1","5":"2","6":"3","7":"4"},"DataVisibility":{"Private":false,"Hidden":false},"NextChoiceId":8,"NextAnswerId":1}},{"SurveyID":"SV_bdByXydulCoImrP","Element":"SQ","PrimaryAttribute":"QID15","SecondaryAttribute":"In-class activities other than polling\u00a0questions\u00a0include any exercise or activity in which the st.","TertiaryAttribute":null,"Payload":{"QuestionText":"<div><span style=\"font-size: 16px;\"><span style=\"font-size: 16px;\"><span style=\"font-size: 16px;\"><span style=\"font-size: 16px;\"><em><strong>In-class activities<\/strong> <u>other than polling&nbsp;questions<\/u>&nbsp;include any exercise or activity in which the students are not listening to a lecture&nbsp;during class, such as student discussions, worksheets, problem sets, case studies, hands-on demonstrations, role plays, concept maps, one-minute essays, think-pair-shares, inquiry-based activities,&nbsp;low point value quizzes, and other related activities.<\/em><\/span><\/span><\/span><\/span><\/div>\n\n<div>&nbsp;<\/div>\n\n<div><span style=\"font-size: 16px;\">Students were asked to <strong>work in groups <\/strong>of two or more on<strong> in-class<\/strong> activities, discussions, assignments, or projects <u>other than&nbsp;polling&nbsp;questions<\/u>&nbsp;approximately:<\/span><\/div>","DefaultChoices":false,"DataExportTag":"Q9","QuestionType":"MC","Selector":"SAHR","SubSelector":"TX","Configuration":{"QuestionDescriptionOption":"UseText","LabelPosition":"BELOW"},"QuestionDescription":"In-class activities other than polling\u00a0questions\u00a0include any exercise or activity in which the st...","Choices":{"1":{"Display":"<span style=\"font-size: 13px;\">zero times<\/span>"},"5":{"Display":"<span style=\"font-size: 13px;\">1-2 times<br>per week<\/span>"},"6":{"Display":"<span style=\"font-size: 13px;\">3-4 times<br>per week<\/span>"},"7":{"Display":"<span style=\"font-size: 13px;\">more than 4 times<br>per week<\/span>"}},"ChoiceOrder":[1,5,6,7],"Validation":{"Settings":{"ForceResponse":"OFF","ForceResponseType":"ON","Type":"None"}},"GradingData":[],"Language":[],"QuestionID":"QID15","RecodeValues":{"1":"0","5":"1","6":"2","7":"3"},"DataVisibility":{"Private":false,"Hidden":false},"NextChoiceId":8,"NextAnswerId":1}},{"SurveyID":"SV_bdByXydulCoImrP","Element":"SQ","PrimaryAttribute":"QID111","SecondaryAttribute":"Indicate the average percent of class time during which students were asked to work in groups of...","TertiaryAttribute":null,"Payload":{"QuestionText":"<span style=\"font-size: 16px;\">Indicate the average percent of class time during which students were asked to <strong>work in groups <\/strong>of two or more:&nbsp;<\/span>","DefaultChoices":false,"DataExportTag":"Q8","QuestionID":"QID111","QuestionType":"Slider","Selector":"HSLIDER","Configuration":{"QuestionDescriptionOption":"UseText","CSSliderMin":0,"CSSliderMax":100,"GridLines":10,"SnapToGrid":false,"NumDecimals":"0","ShowValue":true,"CustomStart":false,"NotApplicable":false,"MobileFirst":true},"QuestionDescription":"Indicate the average percent of class time during which students were asked to work in groups of...","Choices":{"1":{"Display":"&nbsp;"}},"ChoiceOrder":["1"],"Validation":{"Settings":{"ForceResponse":"OFF","ForceResponseType":"ON","Type":"None"}},"GradingData":[],"Language":[],"Labels":{"1":{"Display":"%"}},"DataVisibility":{"Private":false,"Hidden":false},"NextChoiceId":2,"NextAnswerId":2}},{"SurveyID":"SV_bdByXydulCoImrP","Element":"SQ","PrimaryAttribute":"QID109","SecondaryAttribute":"Indicate the\u00a0approximate percent of in-class activities\u00a0for which students were given some form o.","TertiaryAttribute":null,"Payload":{"QuestionText":"<span style=\"font-size: 16px;\">Indicate the&nbsp;approximate percent of <strong>in-class activities<\/strong>&nbsp;for which students were given some form of general or individualized <strong>feedback<\/strong> during class <u>beyond<\/u> simply providing correct or incorrect answers:<\/span>","DefaultChoices":false,"DataExportTag":"Q6","QuestionID":"QID109","QuestionType":"Slider","Selector":"HSLIDER","Configuration":{"QuestionDescriptionOption":"UseText","CSSliderMin":0,"CSSliderMax":100,"GridLines":10,"SnapToGrid":false,"NumDecimals":"0","ShowValue":true,"CustomStart":false,"NotApplicable":false,"MobileFirst":true},"QuestionDescription":"Indicate the\u00a0approximate percent of in-class activities\u00a0for which students were given some form o...","Choices":{"1":{"Display":"&nbsp;"}},"ChoiceOrder":["1"],"Validation":{"Settings":{"ForceResponse":"OFF","ForceResponseType":"ON","Type":"None"}},"GradingData":[],"Language":[],"Labels":{"1":{"Display":"%"}},"DataVisibility":{"Private":false,"Hidden":false},"NextChoiceId":2,"NextAnswerId":2}},{"SurveyID":"SV_bdByXydulCoImrP","Element":"SQ","PrimaryAttribute":"QID108","SecondaryAttribute":"Indicate the\u00a0approximate percent of out-of-class assignments\u00a0 for which students were given some..","TertiaryAttribute":null,"Payload":{"QuestionText":"<span style=\"font-size: 16px;\">Indicate the&nbsp;approximate percent of <strong>out-of-class assignments<\/strong>&nbsp; for which students were given some form of general or individualized <strong>feedback<\/strong> <u>beyond<\/u> simply providing correct or incorrect answers:<\/span>","DefaultChoices":false,"DataExportTag":"Q11","QuestionType":"Slider","Selector":"HSLIDER","Configuration":{"QuestionDescriptionOption":"UseText","CSSliderMin":0,"CSSliderMax":100,"GridLines":10,"SnapToGrid":false,"NumDecimals":"0","ShowValue":true,"CustomStart":false,"NotApplicable":false,"MobileFirst":true},"QuestionDescription":"Indicate the\u00a0approximate percent of out-of-class assignments\u00a0 for which students were given some...","Choices":{"1":{"Display":"&nbsp;"}},"ChoiceOrder":["1"],"Validation":{"Settings":{"ForceResponse":"OFF","ForceResponseType":"ON","Type":"None"}},"GradingData":[],"Language":[],"Labels":{"1":{"Display":"%"}},"QuestionID":"QID108"}},{"SurveyID":"SV_bdByXydulCoImrP","Element":"SQ","PrimaryAttribute":"QID105","SecondaryAttribute":"Indicate the\u00a0approximate percent of polling questions\u00a0for which students were asked to discuss th.","TertiaryAttribute":null,"Payload":{"QuestionText":"<span style=\"font-size: 16px;\">Indicate the&nbsp;approximate percent of <strong>polling questions<\/strong>&nbsp;for which students were asked to discuss the questions in pairs or small groups:<\/span>","DefaultChoices":false,"DataExportTag":"Q4","QuestionType":"Slider","Selector":"HSLIDER","Configuration":{"QuestionDescriptionOption":"UseText","CSSliderMin":0,"CSSliderMax":100,"GridLines":10,"SnapToGrid":false,"NumDecimals":"0","ShowValue":true,"CustomStart":false,"NotApplicable":false,"MobileFirst":true},"QuestionDescription":"Indicate the\u00a0approximate percent of polling questions\u00a0for which students were asked to discuss th...","Choices":{"4":{"Display":"&nbsp;"}},"ChoiceOrder":["4"],"Validation":{"Settings":{"ForceResponse":"OFF","ForceResponseType":"ON","Type":"None"}},"GradingData":[],"Language":[],"Labels":{"1":{"Display":"%"}},"QuestionID":"QID105","DataVisibility":{"Private":false,"Hidden":false},"NextChoiceId":5,"NextAnswerId":2}},{"SurveyID":"SV_bdByXydulCoImrP","Element":"SQ","PrimaryAttribute":"QID106","SecondaryAttribute":"Indicate the\u00a0approximate percent of questions or components on\u00a0major exams or term projects for w.","TertiaryAttribute":null,"Payload":{"QuestionText":"<span style=\"font-size: 16px;\">Indicate the&nbsp;approximate percent of questions or components on&nbsp;<strong>major exams or term projects <\/strong>for which students were given some form of general or individualized <strong>feedback<\/strong> <u>beyond<\/u> simply providing correct or incorrect answers:<\/span>","DefaultChoices":false,"DataExportTag":"Q14","QuestionType":"Slider","Selector":"HSLIDER","Configuration":{"QuestionDescriptionOption":"UseText","CSSliderMin":0,"CSSliderMax":100,"GridLines":10,"SnapToGrid":false,"NumDecimals":"0","ShowValue":true,"CustomStart":false,"NotApplicable":false,"MobileFirst":true},"QuestionDescription":"Indicate the\u00a0approximate percent of questions or components on\u00a0major exams or term projects for w...","Choices":{"1":{"Display":"&nbsp;"}},"ChoiceOrder":["1"],"Validation":{"Settings":{"ForceResponse":"OFF","ForceResponseType":"ON","Type":"None"}},"GradingData":[],"Language":[],"Labels":{"1":{"Display":"%"}},"QuestionID":"QID106"}},{"SurveyID":"SV_bdByXydulCoImrP","Element":"SQ","PrimaryAttribute":"QID1","SecondaryAttribute":"Indicate the\u00a0average percent of class time during which students were asked to answer questions,...","TertiaryAttribute":null,"Payload":{"QuestionText":"<span style=\"font-size: 16px;\">Indicate the&nbsp;average percent of class time during which students were asked to answer questions, solve problems, or complete activities <u>other than listening to a lecture<\/u>:<\/span>","DefaultChoices":false,"DataExportTag":"Q1","QuestionType":"Slider","Selector":"HSLIDER","Configuration":{"QuestionDescriptionOption":"UseText","CSSliderMin":0,"CSSliderMax":100,"GridLines":10,"SnapToGrid":false,"NumDecimals":"0","ShowValue":true,"CustomStart":true,"SliderStartPositions":{"1":0},"NotApplicable":false,"MobileFirst":true},"QuestionDescription":"Indicate the\u00a0average percent of class time during which students were asked to answer questions,...","Choices":{"1":{"Display":"&nbsp;"}},"ChoiceOrder":[1],"Validation":{"Settings":{"ForceResponse":"OFF","ForceResponseType":"ON","Type":"None"}},"GradingData":[],"Language":[],"Labels":{"6":{"Display":"%"}},"QuestionID":"QID1"}},{"SurveyID":"SV_bdByXydulCoImrP","Element":"SQ","PrimaryAttribute":"QID2","SecondaryAttribute":"Learning goals\u00a0are\u00a0statements\u00a0provided by the instructor that inform\u00a0students of the specific kn","TertiaryAttribute":null,"Payload":{"QuestionText":"<p><span style=\"font-size: 16px;\"><em>Learning goals&nbsp;are&nbsp;statements&nbsp;<u>provided by the instructor<\/u> that inform&nbsp;students of the specific knowledge and skills that the instructor expects students to master in a course. Learning goals can be presented to students in the form of learning objectives, specific study questions, study guides, focal points, etc.<\/em><br \/>\n<br \/>\n<strong>Learning goals were provided for:<\/strong><\/span><\/p>\n\n<p><br \/>\n<span style=\"color: rgb(255, 0, 0);\"><span style=\"font-size: 19px;\"><u><strong><em>Please select all that apply.<\/em><\/strong><\/u><\/span><\/span><\/p>","DefaultChoices":false,"DataExportTag":"Q2","QuestionType":"MC","Selector":"MAHR","SubSelector":"TX","Configuration":{"QuestionDescriptionOption":"UseText","LabelPosition":"BELOW"},"QuestionDescription":"Learning goals\u00a0are\u00a0statements\u00a0provided by the instructor that inform\u00a0students of the specific kno...","Choices":{"1":{"Display":"<span style=\"font-size: 13px;\">not provided<br>to students<\/span>"},"4":{"Display":"<span style=\"font-size: 13px;\">each broad topic<br>or chapter<\/span>"},"5":{"Display":"<span style=\"font-size: 13px;\">each specific<br>subtopic or chapter subsection<\/span>"},"6":{"Display":"<span style=\"font-size: 13px;\">some or most individual activities or assignments<\/span>"},"7":{"Display":"<span style=\"font-size: 13px;\">each individual activity or assignment<\/span>"}},"ChoiceOrder":[1,4,5,6,"7"],"Validation":{"Settings":{"ForceResponse":"OFF","ForceResponseType":"ON","Type":"None"}},"GradingData":[],"Language":[],"QuestionID":"QID2","RecodeValues":{"1":"0","4":"1","5":"2","6":"3","7":"4"},"DataVisibility":{"Private":false,"Hidden":false},"NextChoiceId":8,"NextAnswerId":1}},{"SurveyID":"SV_bdByXydulCoImrP","Element":"SQ","PrimaryAttribute":"QID14","SecondaryAttribute":"Learning goals\u00a0are\u00a0statements\u00a0provided by the instructor that inform\u00a0students of the specific kn","TertiaryAttribute":null,"Payload":{"QuestionText":"<div><span style=\"font-size: 16px;\"><em>Learning goals&nbsp;are&nbsp;statements&nbsp;<u>provided by the instructor<\/u> that inform&nbsp;students of the specific knowledge and skills that the instructor expects students to master in a course. Learning goals can be presented to students in the form of learning objectives, specific study questions, study guides, focal points, etc.<\/em><\/span><\/div>\n\n<div>&nbsp;<\/div>\n\n<div><span style=\"font-size: 16px;\">Indicate the&nbsp;approximate percent of&nbsp;questions or components on <strong>major exams or term projects&nbsp;<\/strong>that overlapped with the<strong>&nbsp;learning goals&nbsp;<\/strong><u>provided by the instructor<\/u>:<\/span><\/div>","DefaultChoices":false,"DataExportTag":"Q13","QuestionType":"Slider","Selector":"HSLIDER","Configuration":{"QuestionDescriptionOption":"UseText","CSSliderMin":0,"CSSliderMax":100,"GridLines":10,"SnapToGrid":false,"NumDecimals":"0","ShowValue":true,"CustomStart":false,"NotApplicable":false,"MobileFirst":true},"QuestionDescription":"Learning goals\u00a0are\u00a0statements\u00a0provided by the instructor that inform\u00a0students of the specific kno...","Choices":{"1":{"Display":"&nbsp;"}},"ChoiceOrder":[1],"Validation":{"Settings":{"ForceResponse":"OFF","ForceResponseType":"ON","Type":"None"}},"GradingData":[],"Language":[],"Labels":{"1":{"Display":"%"}},"QuestionID":"QID14","DisplayLogic":{"0":{"0":{"LogicType":"Question","QuestionID":"QID2","QuestionIsInLoop":"no","ChoiceLocator":"q:\/\/QID2\/SelectableChoice\/2","Operator":"Selected","QuestionIDFromLocator":"QID2","LeftOperand":"q:\/\/QID2\/SelectableChoice\/2","Type":"Expression","Description":"<span class=\"Error\">Invalid Logic<\/span> <a href=\"javascript:void(0)\" clickcallback=\"Qualtrics.DisplayLogic.edit:DL_87983451\" instanceid=\"LE_58495901\">Click Here to Edit Logic<\/a>"},"1":{"LogicType":"Question","QuestionID":"QID2","QuestionIsInLoop":"no","ChoiceLocator":"q:\/\/QID2\/SelectableChoice\/3","Operator":"Selected","QuestionIDFromLocator":"QID2","LeftOperand":"q:\/\/QID2\/SelectableChoice\/3","Type":"Expression","Description":"<span class=\"Error\">Invalid Logic<\/span> <a href=\"javascript:void(0)\" clickcallback=\"Qualtrics.DisplayLogic.edit:DL_87983451\" instanceid=\"LE_58495901\">Click Here to Edit Logic<\/a>","Conjuction":"Or"},"2":{"LogicType":"Question","QuestionID":"QID2","QuestionIsInLoop":"no","ChoiceLocator":"q:\/\/QID2\/SelectableChoice\/4","Operator":"Selected","QuestionIDFromLocator":"QID2","LeftOperand":"q:\/\/QID2\/SelectableChoice\/4","Type":"Expression","Description":"<span class=\"ConjDesc\">Or<\/span> <span class=\"QuestionDesc\">Learning goals&nbsp;are&nbsp;statements&nbsp;provided by the instructor that inform&nbsp;students of the specific kno...<\/span> <span class=\"LeftOpDesc\">&lt;span style=\"font-size: 13px;\"&gt;each broad topic&lt;br&gt;or chapter&lt;\/span&gt;<\/span> <span class=\"OpDesc\">Is Selected<\/span> ","Conjuction":"Or"},"3":{"LogicType":"Question","QuestionID":"QID2","QuestionIsInLoop":"no","ChoiceLocator":"q:\/\/QID2\/SelectableChoice\/5","Operator":"Selected","QuestionIDFromLocator":"QID2","LeftOperand":"q:\/\/QID2\/SelectableChoice\/5","Type":"Expression","Description":"<span class=\"ConjDesc\">Or<\/span> <span class=\"QuestionDesc\">Learning goals&nbsp;are&nbsp;statements&nbsp;provided by the instructor that inform&nbsp;students of the specific kno...<\/span> <span class=\"LeftOpDesc\">&lt;span style=\"font-size: 13px;\"&gt;each specific&lt;br&gt;subtopic or chapter subsection&lt;\/span&gt;<\/span> <span class=\"OpDesc\">Is Selected<\/span> ","Conjuction":"Or"},"4":{"LogicType":"Question","QuestionID":"QID2","QuestionIsInLoop":"no","ChoiceLocator":"q:\/\/QID2\/SelectableChoice\/6","Operator":"Selected","QuestionIDFromLocator":"QID2","LeftOperand":"q:\/\/QID2\/SelectableChoice\/6","Type":"Expression","Description":"<span class=\"ConjDesc\">Or<\/span> <span class=\"QuestionDesc\">Learning goals&nbsp;are&nbsp;statements&nbsp;provided by the instructor that inform&nbsp;students of the specific kno...<\/span> <span class=\"LeftOpDesc\">&lt;span style=\"font-size: 13px;\"&gt;some or most individual activities or assignments&lt;\/span&gt;<\/span> <span class=\"OpDesc\">Is Selected<\/span> ","Conjuction":"Or"},"5":{"LogicType":"Question","QuestionID":"QID2","QuestionIsInLoop":"no","ChoiceLocator":"q:\/\/QID2\/SelectableChoice\/7","Operator":"Selected","QuestionIDFromLocator":"QID2","LeftOperand":"q:\/\/QID2\/SelectableChoice\/7","Type":"Expression","Description":"<span class=\"ConjDesc\">Or<\/span> <span class=\"QuestionDesc\">Learning goals&nbsp;are&nbsp;statements&nbsp;provided by the instructor that inform&nbsp;students of the specific kno...<\/span> <span class=\"LeftOpDesc\">&lt;span style=\"font-size: 13px;\"&gt;each individual activity or assignment&lt;\/span&gt;<\/span> <span class=\"OpDesc\">Is Selected<\/span> ","Conjuction":"Or"},"6":{"LogicType":"Question","QuestionID":"QID2","QuestionIsInLoop":"no","ChoiceLocator":"q:\/\/QID2\/SelectableChoice\/1","Operator":"NotSelected","QuestionIDFromLocator":"QID2","LeftOperand":"q:\/\/QID2\/SelectableChoice\/1","Type":"Expression","Description":"<span class=\"ConjDesc\">And<\/span> <span class=\"QuestionDesc\">Learning goals&nbsp;are&nbsp;statements&nbsp;provided by the instructor that inform&nbsp;students of the specific kno...<\/span> <span class=\"LeftOpDesc\">&lt;span style=\"font-size: 13px;\"&gt;not provided&lt;br&gt;to students&lt;\/span&gt;<\/span> <span class=\"OpDesc\">Is Not Selected<\/span> ","Conjuction":"And"},"Type":"If"},"Type":"BooleanExpression","inPage":false},"DataVisibility":{"Private":false,"Hidden":false},"NextChoiceId":2,"NextAnswerId":2}},{"SurveyID":"SV_bdByXydulCoImrP","Element":"SQ","PrimaryAttribute":"QID104","SecondaryAttribute":"Learning goals\u00a0are\u00a0statements\u00a0provided by the instructor that inform\u00a0students of the specific kn","TertiaryAttribute":null,"Payload":{"QuestionText":"<div><span style=\"font-size: 16px;\"><em>Learning goals&nbsp;are&nbsp;statements&nbsp;<u>provided by the instructor<\/u> that inform&nbsp;students of the specific knowledge and skills that the instructor expects students to master in a course. Learning goals can be presented to students in the form of learning objectives, specific study questions, study guides, focal points, etc.<\/em><\/span><\/div>\n\n<div>&nbsp;<\/div>\n\n<div><span style=\"font-size: 16px;\">Indicate the&nbsp;approximate percent of <strong>polling questions<\/strong>&nbsp;that overlapped with the<strong>&nbsp;learning goals&nbsp;<\/strong><u>provided by the instructor<\/u>:<\/span><\/div>","DefaultChoices":false,"DataExportTag":"Q4","QuestionType":"Slider","Selector":"HSLIDER","Configuration":{"QuestionDescriptionOption":"UseText","CSSliderMin":0,"CSSliderMax":100,"GridLines":10,"SnapToGrid":false,"NumDecimals":"0","ShowValue":true,"CustomStart":true,"NotApplicable":false,"MobileFirst":true,"SliderStartPositions":{"1":0}},"QuestionDescription":"Learning goals\u00a0are\u00a0statements\u00a0provided by the instructor that inform\u00a0students of the specific kno...","Choices":{"1":{"Display":"&nbsp;"}},"ChoiceOrder":["1"],"Validation":{"Settings":{"ForceResponse":"OFF","ForceResponseType":"ON","Type":"None"}},"GradingData":[],"Language":[],"Labels":{"1":{"Display":"%"}},"QuestionID":"QID104","DisplayLogic":{"0":{"0":{"LogicType":"Question","QuestionID":"QID2","QuestionIsInLoop":"no","ChoiceLocator":"q:\/\/QID2\/SelectableChoice\/2","Operator":"Selected","QuestionIDFromLocator":"QID2","LeftOperand":"q:\/\/QID2\/SelectableChoice\/2","Type":"Expression","Description":"<span class=\"Error\">Invalid Logic<\/span> <a href=\"javascript:void(0)\" clickcallback=\"Qualtrics.DisplayLogic.edit:DL_10593677\" instanceid=\"LE_92410846\">Click Here to Edit Logic<\/a>"},"1":{"LogicType":"Question","QuestionID":"QID2","QuestionIsInLoop":"no","ChoiceLocator":"q:\/\/QID2\/SelectableChoice\/3","Operator":"Selected","QuestionIDFromLocator":"QID2","LeftOperand":"q:\/\/QID2\/SelectableChoice\/3","Type":"Expression","Description":"<span class=\"Error\">Invalid Logic<\/span> <a href=\"javascript:void(0)\" clickcallback=\"Qualtrics.DisplayLogic.edit:DL_10593677\" instanceid=\"LE_92410846\">Click Here to Edit Logic<\/a>","Conjuction":"Or"},"2":{"LogicType":"Question","QuestionID":"QID2","QuestionIsInLoop":"no","ChoiceLocator":"q:\/\/QID2\/SelectableChoice\/4","Operator":"Selected","QuestionIDFromLocator":"QID2","LeftOperand":"q:\/\/QID2\/SelectableChoice\/4","Type":"Expression","Description":"<span class=\"ConjDesc\">Or<\/span> <span class=\"QuestionDesc\">Learning goals&nbsp;are&nbsp;statements&nbsp;provided by the instructor that inform&nbsp;students of the specific kno...<\/span> <span class=\"LeftOpDesc\">&lt;span style=\"font-size: 13px;\"&gt;each broad topic&lt;br&gt;or chapter&lt;\/span&gt;<\/span> <span class=\"OpDesc\">Is Selected<\/span> ","Conjuction":"Or"},"3":{"LogicType":"Question","QuestionID":"QID2","QuestionIsInLoop":"no","ChoiceLocator":"q:\/\/QID2\/SelectableChoice\/5","Operator":"Selected","QuestionIDFromLocator":"QID2","LeftOperand":"q:\/\/QID2\/SelectableChoice\/5","Type":"Expression","Description":"<span class=\"ConjDesc\">Or<\/span> <span class=\"QuestionDesc\">Learning goals&nbsp;are&nbsp;statements&nbsp;provided by the instructor that inform&nbsp;students of the specific kno...<\/span> <span class=\"LeftOpDesc\">&lt;span style=\"font-size: 13px;\"&gt;each specific&lt;br&gt;subtopic or chapter subsection&lt;\/span&gt;<\/span> <span class=\"OpDesc\">Is Selected<\/span> ","Conjuction":"Or"},"4":{"LogicType":"Question","QuestionID":"QID2","QuestionIsInLoop":"no","ChoiceLocator":"q:\/\/QID2\/SelectableChoice\/6","Operator":"Selected","QuestionIDFromLocator":"QID2","LeftOperand":"q:\/\/QID2\/SelectableChoice\/6","Type":"Expression","Description":"<span class=\"ConjDesc\">Or<\/span> <span class=\"QuestionDesc\">Learning goals&nbsp;are&nbsp;statements&nbsp;provided by the instructor that inform&nbsp;students of the specific kno...<\/span> <span class=\"LeftOpDesc\">&lt;span style=\"font-size: 13px;\"&gt;some or most individual activities or assignments&lt;\/span&gt;<\/span> <span class=\"OpDesc\">Is Selected<\/span> ","Conjuction":"Or"},"5":{"LogicType":"Question","QuestionID":"QID2","QuestionIsInLoop":"no","ChoiceLocator":"q:\/\/QID2\/SelectableChoice\/7","Operator":"Selected","QuestionIDFromLocator":"QID2","LeftOperand":"q:\/\/QID2\/SelectableChoice\/7","Type":"Expression","Description":"<span class=\"ConjDesc\">Or<\/span> <span class=\"QuestionDesc\">Learning goals&nbsp;are&nbsp;statements&nbsp;provided by the instructor that inform&nbsp;students of the specific kno...<\/span> <span class=\"LeftOpDesc\">&lt;span style=\"font-size: 13px;\"&gt;each individual activity or assignment&lt;\/span&gt;<\/span> <span class=\"OpDesc\">Is Selected<\/span> ","Conjuction":"Or"},"6":{"LogicType":"Question","QuestionID":"QID2","QuestionIsInLoop":"no","ChoiceLocator":"q:\/\/QID2\/SelectableChoice\/1","Operator":"NotSelected","QuestionIDFromLocator":"QID2","LeftOperand":"q:\/\/QID2\/SelectableChoice\/1","Type":"Expression","Description":"<span class=\"ConjDesc\">Or<\/span> <span class=\"QuestionDesc\">Learning goals&nbsp;are&nbsp;statements&nbsp;provided by the instructor that inform&nbsp;students of the specific kno...<\/span> <span class=\"LeftOpDesc\">&lt;span style=\"font-size: 13px;\"&gt;not provided&lt;br&gt;to students&lt;\/span&gt;<\/span> <span class=\"OpDesc\">Is Not Selected<\/span> ","Conjuction":"Or"},"Type":"If"},"Type":"BooleanExpression","inPage":false},"DataVisibility":{"Private":false,"Hidden":false},"NextChoiceId":2,"NextAnswerId":2}},{"SurveyID":"SV_bdByXydulCoImrP","Element":"SQ","PrimaryAttribute":"QID107","SecondaryAttribute":"Learning goals\u00a0are\u00a0statements\u00a0provided by the instructor that inform\u00a0students of the specific kn","TertiaryAttribute":null,"Payload":{"QuestionText":"<div><span style=\"font-size: 16px;\"><em>Learning goals&nbsp;are&nbsp;statements&nbsp;<u>provided by the instructor<\/u> that inform&nbsp;students of the specific knowledge and skills that the instructor expects students to master in a course. Learning goals can be presented to students in the form of learning objectives, specific study questions, study guides, focal points, etc.<\/em><\/span><\/div>\n\n<div>&nbsp;<\/div>\n\n<div><span style=\"font-size: 16px;\">Indicate the&nbsp;approximate percent of <strong>out-of-class assignments&nbsp;<\/strong>that overlapped with the<strong>&nbsp;learning goals&nbsp;<\/strong><u>provided by the instructor<\/u>:<\/span><\/div>","DefaultChoices":false,"DataExportTag":"Q10","QuestionType":"Slider","Selector":"HSLIDER","Configuration":{"QuestionDescriptionOption":"UseText","CSSliderMin":0,"CSSliderMax":100,"GridLines":10,"SnapToGrid":false,"NumDecimals":"0","ShowValue":true,"CustomStart":false,"NotApplicable":false,"MobileFirst":true},"QuestionDescription":"Learning goals\u00a0are\u00a0statements\u00a0provided by the instructor that inform\u00a0students of the specific kno...","Choices":{"1":{"Display":"&nbsp;"}},"ChoiceOrder":["1"],"Validation":{"Settings":{"ForceResponse":"OFF","ForceResponseType":"ON","Type":"None"}},"GradingData":[],"Language":[],"Labels":{"1":{"Display":"%"}},"QuestionID":"QID107","DisplayLogic":{"0":{"0":{"LogicType":"Question","QuestionID":"QID2","QuestionIsInLoop":"no","ChoiceLocator":"q:\/\/QID2\/SelectableChoice\/2","Operator":"Selected","QuestionIDFromLocator":"QID2","LeftOperand":"q:\/\/QID2\/SelectableChoice\/2","Type":"Expression","Description":"<span class=\"Error\">Invalid Logic<\/span> <a href=\"javascript:void(0)\" clickcallback=\"Qualtrics.DisplayLogic.edit:DL_47034941\" instanceid=\"LE_19163702\">Click Here to Edit Logic<\/a>"},"1":{"LogicType":"Question","QuestionID":"QID2","QuestionIsInLoop":"no","ChoiceLocator":"q:\/\/QID2\/SelectableChoice\/3","Operator":"Selected","QuestionIDFromLocator":"QID2","LeftOperand":"q:\/\/QID2\/SelectableChoice\/3","Type":"Expression","Description":"<span class=\"Error\">Invalid Logic<\/span> <a href=\"javascript:void(0)\" clickcallback=\"Qualtrics.DisplayLogic.edit:DL_47034941\" instanceid=\"LE_19163702\">Click Here to Edit Logic<\/a>","Conjuction":"Or"},"2":{"LogicType":"Question","QuestionID":"QID2","QuestionIsInLoop":"no","ChoiceLocator":"q:\/\/QID2\/SelectableChoice\/4","Operator":"Selected","QuestionIDFromLocator":"QID2","LeftOperand":"q:\/\/QID2\/SelectableChoice\/4","Type":"Expression","Description":"<span class=\"ConjDesc\">Or<\/span> <span class=\"QuestionDesc\">Learning goals&nbsp;are&nbsp;statements&nbsp;provided by the instructor that inform&nbsp;students of the specific kno...<\/span> <span class=\"LeftOpDesc\">&lt;span style=\"font-size: 13px;\"&gt;each broad topic&lt;br&gt;or chapter&lt;\/span&gt;<\/span> <span class=\"OpDesc\">Is Selected<\/span> ","Conjuction":"Or"},"3":{"LogicType":"Question","QuestionID":"QID2","QuestionIsInLoop":"no","ChoiceLocator":"q:\/\/QID2\/SelectableChoice\/5","Operator":"Selected","QuestionIDFromLocator":"QID2","LeftOperand":"q:\/\/QID2\/SelectableChoice\/5","Type":"Expression","Description":"<span class=\"ConjDesc\">Or<\/span> <span class=\"QuestionDesc\">Learning goals&nbsp;are&nbsp;statements&nbsp;provided by the instructor that inform&nbsp;students of the specific kno...<\/span> <span class=\"LeftOpDesc\">&lt;span style=\"font-size: 13px;\"&gt;each specific&lt;br&gt;subtopic or chapter subsection&lt;\/span&gt;<\/span> <span class=\"OpDesc\">Is Selected<\/span> ","Conjuction":"Or"},"4":{"LogicType":"Question","QuestionID":"QID2","QuestionIsInLoop":"no","ChoiceLocator":"q:\/\/QID2\/SelectableChoice\/6","Operator":"Selected","QuestionIDFromLocator":"QID2","LeftOperand":"q:\/\/QID2\/SelectableChoice\/6","Type":"Expression","Description":"<span class=\"ConjDesc\">Or<\/span> <span class=\"QuestionDesc\">Learning goals&nbsp;are&nbsp;statements&nbsp;provided by the instructor that inform&nbsp;students of the specific kno...<\/span> <span class=\"LeftOpDesc\">&lt;span style=\"font-size: 13px;\"&gt;some or most individual activities or assignments&lt;\/span&gt;<\/span> <span class=\"OpDesc\">Is Selected<\/span> ","Conjuction":"Or"},"5":{"LogicType":"Question","QuestionID":"QID2","QuestionIsInLoop":"no","ChoiceLocator":"q:\/\/QID2\/SelectableChoice\/7","Operator":"Selected","QuestionIDFromLocator":"QID2","LeftOperand":"q:\/\/QID2\/SelectableChoice\/7","Type":"Expression","Description":"<span class=\"ConjDesc\">Or<\/span> <span class=\"QuestionDesc\">Learning goals&nbsp;are&nbsp;statements&nbsp;provided by the instructor that inform&nbsp;students of the specific kno...<\/span> <span class=\"LeftOpDesc\">&lt;span style=\"font-size: 13px;\"&gt;each individual activity or assignment&lt;\/span&gt;<\/span> <span class=\"OpDesc\">Is Selected<\/span> ","Conjuction":"Or"},"6":{"LogicType":"Question","QuestionID":"QID2","QuestionIsInLoop":"no","ChoiceLocator":"q:\/\/QID2\/SelectableChoice\/1","Operator":"NotSelected","QuestionIDFromLocator":"QID2","LeftOperand":"q:\/\/QID2\/SelectableChoice\/1","Type":"Expression","Description":"<span class=\"ConjDesc\">Or<\/span> <span class=\"QuestionDesc\">Learning goals&nbsp;are&nbsp;statements&nbsp;provided by the instructor that inform&nbsp;students of the specific kno...<\/span> <span class=\"LeftOpDesc\">&lt;span style=\"font-size: 13px;\"&gt;not provided&lt;br&gt;to students&lt;\/span&gt;<\/span> <span class=\"OpDesc\">Is Not Selected<\/span> ","Conjuction":"Or"},"Type":"If"},"Type":"BooleanExpression","inPage":false},"DataVisibility":{"Private":false,"Hidden":false},"NextChoiceId":2,"NextAnswerId":2}},{"SurveyID":"SV_bdByXydulCoImrP","Element":"SQ","PrimaryAttribute":"QID110","SecondaryAttribute":"Learning goals\u00a0are\u00a0statements\u00a0provided by the instructor that inform\u00a0students of the specific kn","TertiaryAttribute":null,"Payload":{"QuestionText":"<div><span style=\"font-size: 16px;\"><em>Learning goals&nbsp;are&nbsp;statements&nbsp;<u>provided by the instructor<\/u> that inform&nbsp;students of the specific knowledge and skills that the instructor expects students to master in a course. Learning goals can be presented to students in the form of learning objectives, specific study questions, study guides, focal points, etc.<\/em><\/span><\/div>\n\n<div>&nbsp;<\/div>\n\n<div><span style=\"font-size: 16px;\">Indicate the&nbsp;approximate percent of&nbsp;<strong>in-class activities <\/strong>that overlapped with the<strong>&nbsp;learning goals&nbsp;<\/strong><u>provided by the instructor<\/u>:<\/span><\/div>","DefaultChoices":false,"DataExportTag":"Q7","QuestionType":"Slider","Selector":"HSLIDER","Configuration":{"QuestionDescriptionOption":"UseText","CSSliderMin":0,"CSSliderMax":100,"GridLines":10,"SnapToGrid":false,"NumDecimals":"0","ShowValue":true,"CustomStart":false,"NotApplicable":false,"MobileFirst":true},"QuestionDescription":"Learning goals\u00a0are\u00a0statements\u00a0provided by the instructor that inform\u00a0students of the specific kno...","Choices":{"1":{"Display":"&nbsp;"}},"ChoiceOrder":["1"],"Validation":{"Settings":{"ForceResponse":"OFF","ForceResponseType":"ON","Type":"None"}},"GradingData":[],"Language":[],"Labels":{"1":{"Display":"%"}},"QuestionID":"QID110","DisplayLogic":{"0":{"0":{"LogicType":"Question","QuestionID":"QID2","QuestionIsInLoop":"no","ChoiceLocator":"q:\/\/QID2\/SelectableChoice\/2","Operator":"Selected","QuestionIDFromLocator":"QID2","LeftOperand":"q:\/\/QID2\/SelectableChoice\/2","Type":"Expression","Description":"<span class=\"Error\">Invalid Logic<\/span> <a href=\"javascript:void(0)\" clickcallback=\"Qualtrics.DisplayLogic.edit:DL_28887813\" instanceid=\"LE_38928081\">Click Here to Edit Logic<\/a>"},"1":{"LogicType":"Question","QuestionID":"QID2","QuestionIsInLoop":"no","ChoiceLocator":"q:\/\/QID2\/SelectableChoice\/3","Operator":"Selected","QuestionIDFromLocator":"QID2","LeftOperand":"q:\/\/QID2\/SelectableChoice\/3","Type":"Expression","Description":"<span class=\"Error\">Invalid Logic<\/span> <a href=\"javascript:void(0)\" clickcallback=\"Qualtrics.DisplayLogic.edit:DL_28887813\" instanceid=\"LE_38928081\">Click Here to Edit Logic<\/a>","Conjuction":"Or"},"2":{"LogicType":"Question","QuestionID":"QID2","QuestionIsInLoop":"no","ChoiceLocator":"q:\/\/QID2\/SelectableChoice\/4","Operator":"Selected","QuestionIDFromLocator":"QID2","LeftOperand":"q:\/\/QID2\/SelectableChoice\/4","Type":"Expression","Description":"<span class=\"ConjDesc\">Or<\/span> <span class=\"QuestionDesc\">Learning goals&nbsp;are&nbsp;statements&nbsp;provided by the instructor that inform&nbsp;students of the specific kno...<\/span> <span class=\"LeftOpDesc\">&lt;span style=\"font-size: 13px;\"&gt;each broad topic&lt;br&gt;or chapter&lt;\/span&gt;<\/span> <span class=\"OpDesc\">Is Selected<\/span> ","Conjuction":"Or"},"3":{"LogicType":"Question","QuestionID":"QID2","QuestionIsInLoop":"no","ChoiceLocator":"q:\/\/QID2\/SelectableChoice\/5","Operator":"Selected","QuestionIDFromLocator":"QID2","LeftOperand":"q:\/\/QID2\/SelectableChoice\/5","Type":"Expression","Description":"<span class=\"ConjDesc\">Or<\/span> <span class=\"QuestionDesc\">Learning goals&nbsp;are&nbsp;statements&nbsp;provided by the instructor that inform&nbsp;students of the specific kno...<\/span> <span class=\"LeftOpDesc\">&lt;span style=\"font-size: 13px;\"&gt;each specific&lt;br&gt;subtopic or chapter subsection&lt;\/span&gt;<\/span> <span class=\"OpDesc\">Is Selected<\/span> ","Conjuction":"Or"},"4":{"LogicType":"Question","QuestionID":"QID2","QuestionIsInLoop":"no","ChoiceLocator":"q:\/\/QID2\/SelectableChoice\/6","Operator":"Selected","QuestionIDFromLocator":"QID2","LeftOperand":"q:\/\/QID2\/SelectableChoice\/6","Type":"Expression","Description":"<span class=\"ConjDesc\">Or<\/span> <span class=\"QuestionDesc\">Learning goals&nbsp;are&nbsp;statements&nbsp;provided by the instructor that inform&nbsp;students of the specific kno...<\/span> <span class=\"LeftOpDesc\">&lt;span style=\"font-size: 13px;\"&gt;some or most individual activities or assignments&lt;\/span&gt;<\/span> <span class=\"OpDesc\">Is Selected<\/span> ","Conjuction":"Or"},"5":{"LogicType":"Question","QuestionID":"QID2","QuestionIsInLoop":"no","ChoiceLocator":"q:\/\/QID2\/SelectableChoice\/7","Operator":"Selected","QuestionIDFromLocator":"QID2","LeftOperand":"q:\/\/QID2\/SelectableChoice\/7","Type":"Expression","Description":"<span class=\"ConjDesc\">Or<\/span> <span class=\"QuestionDesc\">Learning goals&nbsp;are&nbsp;statements&nbsp;provided by the instructor that inform&nbsp;students of the specific kno...<\/span> <span class=\"LeftOpDesc\">&lt;span style=\"font-size: 13px;\"&gt;each individual activity or assignment&lt;\/span&gt;<\/span> <span class=\"OpDesc\">Is Selected<\/span> ","Conjuction":"Or"},"6":{"LogicType":"Question","QuestionID":"QID2","QuestionIsInLoop":"no","ChoiceLocator":"q:\/\/QID2\/SelectableChoice\/1","Operator":"NotSelected","QuestionIDFromLocator":"QID2","LeftOperand":"q:\/\/QID2\/SelectableChoice\/1","Type":"Expression","Description":"<span class=\"ConjDesc\">Or<\/span> <span class=\"QuestionDesc\">Learning goals&nbsp;are&nbsp;statements&nbsp;provided by the instructor that inform&nbsp;students of the specific kno...<\/span> <span class=\"LeftOpDesc\">&lt;span style=\"font-size: 13px;\"&gt;not provided&lt;br&gt;to students&lt;\/span&gt;<\/span> <span class=\"OpDesc\">Is Not Selected<\/span> ","Conjuction":"Or"},"Type":"If"},"Type":"BooleanExpression","inPage":false},"DataVisibility":{"Private":false,"Hidden":false},"NextChoiceId":2,"NextAnswerId":2}},{"SurveyID":"SV_bdByXydulCoImrP","Element":"SQ","PrimaryAttribute":"QID183","SecondaryAttribute":"Misto logo","TertiaryAttribute":null,"Payload":{"QuestionText":"Misto logo","DefaultChoices":false,"DataExportTag":"logo","QuestionType":"DB","Selector":"GRB","SubSelector":"WOTXB","Configuration":{"QuestionDescriptionOption":"UseText"},"QuestionDescription":"Misto logo","ChoiceOrder":[],"Validation":{"Settings":{"Type":"None"}},"GradingData":[],"Language":[],"Graphics":"IM_bsjef5Cr9KCPuyV","GraphicsDescription":"Misto logo","QuestionID":"QID183","PrivateData":false,"DataVisibility":{"Private":false,"Hidden":false},"NextChoiceId":1,"NextAnswerId":1}},{"SurveyID":"SV_bdByXydulCoImrP","Element":"SQ","PrimaryAttribute":"QID39","SecondaryAttribute":"Models\u00a0are tools\u00a0used to summarize a scientific process, including drawing pathways, diagrams, sc.","TertiaryAttribute":null,"Payload":{"QuestionText":"<p><span style=\"font-size: 16px;\"><em>Models&nbsp;are tools&nbsp;used to summarize a scientific process, including drawing pathways, diagrams, schematics, concept maps, flow charts, &quot;road maps&quot;, tables, illustrative models, box-and-arrow diagrams,&nbsp;etc.<\/em><br \/>\n<br \/>\nStudents were asked to&nbsp;make&nbsp;<u>or<\/u> interpret&nbsp;models to summarize scientific processes approximately:<\/span><\/p>","DefaultChoices":false,"DataExportTag":"Q26","QuestionType":"MC","Selector":"SAHR","SubSelector":"TX","Configuration":{"QuestionDescriptionOption":"UseText","LabelPosition":"BELOW"},"QuestionDescription":"Models\u00a0are tools\u00a0used to summarize a scientific process, including drawing pathways, diagrams, sc...","Choices":[],"ChoiceOrder":[],"Validation":{"Settings":{"ForceResponse":"OFF","ForceResponseType":"ON","Type":"None"}},"GradingData":[],"Language":[],"QuestionID":"QID39","DynamicChoices":{"DynamicType":"ChoiceGroup","Locator":"q:\/\/QID15\/ChoiceGroup\/AllChoices?displayLogic=0","Type":"Dynamic","Description":"All Choices - Displayed & Hidden"},"DynamicChoicesData":[],"RecodeValues":{"x1":"0","x5":"1","x6":"2","x7":"3"},"DataVisibility":{"Private":false,"Hidden":false},"NextChoiceId":1,"NextAnswerId":1}},{"SurveyID":"SV_bdByXydulCoImrP","Element":"SQ","PrimaryAttribute":"QID9","SecondaryAttribute":"Out-of-class assignments are any required exercise, activity, or project completed outside of cla...","TertiaryAttribute":null,"Payload":{"QuestionText":"<p><span style=\"font-size: 16px;\"><em><strong>Out-of-class assignments <\/strong>are any required exercise, activity, or project completed outside of class time, <u>other than<\/u> reading&nbsp;a textbook or&nbsp;watching a video.&nbsp;Out-of-class assignments include&nbsp;worksheets, problem sets, case studies, online learning tools,&nbsp;inquiry-based activities, low point value quizzes, discussion boards, and other related activities.<\/em><br \/>\n<br \/>\nStudents were asked to complete <strong>out-of-class assignments <\/strong>approximately:<\/span><\/p>","DefaultChoices":false,"DataExportTag":"Q9","QuestionType":"MC","Selector":"SAHR","SubSelector":"TX","Configuration":{"QuestionDescriptionOption":"UseText","LabelPosition":"BELOW"},"QuestionDescription":"Out-of-class assignments are any required exercise, activity, or project completed outside of cla...","Choices":{"1":{"Display":"<span style=\"font-size:11px;\">zero times<\/span>"},"3":{"Display":"<span style=\"font-size:11px;\">up to 1 assignment<br \/>\nper month<\/span>"},"4":{"Display":"<span style=\"font-size:11px;\">2-3 assignments<br \/>\nper month<\/span>"},"5":{"Display":"<span style=\"font-size:11px;\">1 assignment<br \/>\nper week<\/span>"},"6":{"Display":"<span style=\"font-size:11px;\">2-3 assignments<br \/>\nper week<\/span>"},"7":{"Display":"<span style=\"font-size:11px;\">4-5 assignments<br \/>\nper week<\/span>"},"8":{"Display":"<span style=\"font-size:11px;\">more than 5 assignments<br \/>\nper week<\/span>"}},"ChoiceOrder":[1,3,4,5,6,7,"8"],"Validation":{"Settings":{"ForceResponse":"OFF","ForceResponseType":"ON","Type":"None"}},"GradingData":[],"Language":[],"QuestionID":"QID9","RecodeValues":{"1":"0","3":"1","4":"2","5":"3","6":"4","7":"5","8":"6"}}},{"SurveyID":"SV_bdByXydulCoImrP","Element":"SQ","PrimaryAttribute":"QID16","SecondaryAttribute":"Out-of-class assignments are any required exercise, activity, or project completed outside of cla...","TertiaryAttribute":null,"Payload":{"QuestionText":"<div><span style=\"font-size: 16px;\"><span style=\"font-size: 16px;\"><span style=\"font-size: 16px;\"><em><strong>Out-of-class assignments <\/strong>are any required exercise, activity, or project completed outside of class time, <u>other than<\/u> reading&nbsp;a textbook or&nbsp;watching a video.&nbsp;Out-of-class assignments include&nbsp;worksheets, problem sets, case studies, online learning tools,&nbsp;inquiry-based activities, low point value quizzes, discussion boards, and other related activities.<\/em><\/span><\/span><\/span><\/div>\n\n<div>&nbsp;<\/div>\n\n<div><span style=\"font-size: 16px;\">Students were asked&nbsp;or encouraged to <strong>work in groups<\/strong> of two or more on <strong>out-of-class <\/strong>activities, assignments, or projects approximately:<\/span><\/div>","DefaultChoices":false,"DataExportTag":"Q18","QuestionType":"MC","Selector":"SAHR","SubSelector":"TX","Configuration":{"QuestionDescriptionOption":"UseText","LabelPosition":"BELOW"},"QuestionDescription":"Out-of-class assignments are any required exercise, activity, or project completed outside of cla...","Choices":[],"ChoiceOrder":[],"Validation":{"Settings":{"ForceResponse":"OFF","ForceResponseType":"ON","Type":"None"}},"GradingData":[],"Language":[],"QuestionID":"QID16","DynamicChoicesData":[],"DynamicChoices":{"DynamicType":"ChoiceGroup","Locator":"q:\/\/QID15\/ChoiceGroup\/AllChoices?displayLogic=0","Type":"Dynamic","Description":"All Choices - Displayed & Hidden"},"RecodeValues":{"x1":"0","x2":"1","x3":"2","x4":"3","x5":"4","x6":"5","x7":"6"}}},{"SurveyID":"SV_bdByXydulCoImrP","Element":"SQ","PrimaryAttribute":"QID56","SecondaryAttribute":"Please complete the survey based only on\u00a0the lecture portion of this course for the week specifie..","TertiaryAttribute":null,"Payload":{"QuestionText":"<p><span style=\"font-size: 16px;\"><span style='display: inline !important; float: none; background-color: transparent; color: rgb(64, 64, 64); font-family: \"Qualtrics Grotesque\",\"Helvetica Neue\",Helvetica,Arial,sans-serif; font-size: 16px; font-style: normal; font-variant: normal; font-weight: 400; letter-spacing: normal; orphans: 2; text-align: left; text-decoration: none; text-indent: 0px; text-transform: none; -webkit-text-stroke-width: 0px; white-space: normal; word-spacing: 0px;'>Please complete the survey based only on&nbsp;the lecture portion of this course for the week specified by your instructor.<\/span><\/span><\/p>","DefaultChoices":false,"DataExportTag":"Pg15.2","QuestionType":"DB","Selector":"TB","Configuration":{"QuestionDescriptionOption":"UseText"},"QuestionDescription":"Please complete the survey based only on\u00a0the lecture portion of this course for the week specifie...","ChoiceOrder":[],"Validation":{"Settings":{"Type":"None"}},"GradingData":[],"Language":[],"QuestionID":"QID56","DataVisibility":{"Private":false,"Hidden":false},"NextChoiceId":1,"NextAnswerId":1}},{"SurveyID":"SV_bdByXydulCoImrP","Element":"SQ","PrimaryAttribute":"QID101","SecondaryAttribute":"Please complete the survey based only on\u00a0the lecture portion of this course for the week specifie..","TertiaryAttribute":null,"Payload":{"QuestionText":"<strong><span style=\"font-size: 16px;\">Please complete the survey based only on&nbsp;the lecture portion of this course for the week specified by your instructor.<\/span><\/strong>","DefaultChoices":false,"DataExportTag":"Pg2.2","QuestionType":"DB","Selector":"TB","Configuration":{"QuestionDescriptionOption":"UseText"},"QuestionDescription":"Please complete the survey based only on\u00a0the lecture portion of this course for the week specifie...","ChoiceOrder":[],"Validation":{"Settings":{"Type":"None"}},"GradingData":[],"Language":[],"QuestionID":"QID101","DataVisibility":{"Private":false,"Hidden":false},"NextChoiceId":1,"NextAnswerId":1}},{"SurveyID":"SV_bdByXydulCoImrP","Element":"SQ","PrimaryAttribute":"QID114","SecondaryAttribute":"Please complete the survey based only on\u00a0the lecture portion of this course for the week specifie..","TertiaryAttribute":null,"Payload":{"QuestionText":"<span style=\"font-size: 16px;\"><span style='display: inline !important; float: none; background-color: transparent; color: rgb(64, 64, 64); font-family: \"Qualtrics Grotesque\",\"Helvetica Neue\",Helvetica,Arial,sans-serif; font-size: 16px; font-style: normal; font-variant: normal; font-weight: 400; letter-spacing: normal; orphans: 2; text-align: left; text-decoration: none; text-indent: 0px; text-transform: none; -webkit-text-stroke-width: 0px; white-space: normal; word-spacing: 0px;'>Please complete the survey based only on&nbsp;the lecture portion of this course for the week specified by your instructor.<\/span><\/span>","DataExportTag":"Pg16.2","QuestionType":"MC","Selector":"SAVR","SubSelector":"TX","Configuration":{"QuestionDescriptionOption":"UseText"},"QuestionDescription":"Please complete the survey based only on\u00a0the lecture portion of this course for the week specifie...","Choices":[],"DynamicChoicesData":[],"ChoiceOrder":[],"Validation":{"Settings":{"ForceResponse":"OFF","ForceResponseType":"ON","Type":"None"}},"Language":[],"QuestionID":"QID114","DataVisibility":{"Private":false,"Hidden":false},"NextChoiceId":1,"NextAnswerId":1}},{"SurveyID":"SV_bdByXydulCoImrP","Element":"SQ","PrimaryAttribute":"QID115","SecondaryAttribute":"Please complete the survey based only on\u00a0the lecture portion of this course for the week specifie..","TertiaryAttribute":null,"Payload":{"QuestionText":"<span style=\"font-size: 16px;\"><span style='display: inline !important; float: none; background-color: transparent; color: rgb(64, 64, 64); font-family: \"Qualtrics Grotesque\",\"Helvetica Neue\",Helvetica,Arial,sans-serif; font-size: 16px; font-style: normal; font-variant: normal; font-weight: 400; letter-spacing: normal; orphans: 2; text-align: left; text-decoration: none; text-indent: 0px; text-transform: none; -webkit-text-stroke-width: 0px; white-space: normal; word-spacing: 0px;'>Please complete the survey based only on&nbsp;the lecture portion of this course for the week specified by your instructor.<\/span><\/span>","DefaultChoices":false,"DataExportTag":"Pg18.2","QuestionType":"DB","Selector":"TB","Configuration":{"QuestionDescriptionOption":"UseText"},"QuestionDescription":"Please complete the survey based only on\u00a0the lecture portion of this course for the week specifie...","ChoiceOrder":[],"Validation":{"Settings":{"Type":"None"}},"GradingData":[],"Language":[],"QuestionID":"QID115","DataVisibility":{"Private":false,"Hidden":false},"NextChoiceId":1,"NextAnswerId":1}},{"SurveyID":"SV_bdByXydulCoImrP","Element":"SQ","PrimaryAttribute":"QID116","SecondaryAttribute":"Please complete the survey based only on\u00a0the lecture portion of this course for the week specifie..","TertiaryAttribute":null,"Payload":{"QuestionText":"<span style=\"font-size: 16px;\"><span style='display: inline !important; float: none; background-color: transparent; color: rgb(64, 64, 64); font-family: \"Qualtrics Grotesque\",\"Helvetica Neue\",Helvetica,Arial,sans-serif; font-size: 16px; font-style: normal; font-variant: normal; font-weight: 400; letter-spacing: normal; orphans: 2; text-align: left; text-decoration: none; text-indent: 0px; text-transform: none; -webkit-text-stroke-width: 0px; white-space: normal; word-spacing: 0px;'>Please complete the survey based only on&nbsp;the lecture portion of this course for the week specified by your instructor.<\/span><\/span>","DefaultChoices":false,"DataExportTag":"Pg17.2","QuestionType":"DB","Selector":"TB","Configuration":{"QuestionDescriptionOption":"UseText"},"QuestionDescription":"Please complete the survey based only on\u00a0the lecture portion of this course for the week specifie...","ChoiceOrder":[],"Validation":{"Settings":{"Type":"None"}},"GradingData":[],"Language":[],"QuestionID":"QID116","DataVisibility":{"Private":false,"Hidden":false},"NextChoiceId":1,"NextAnswerId":1}},{"SurveyID":"SV_bdByXydulCoImrP","Element":"SQ","PrimaryAttribute":"QID117","SecondaryAttribute":"Please complete the survey based only on\u00a0the lecture portion of this course for the week specifie..","TertiaryAttribute":null,"Payload":{"QuestionText":"<p><span style=\"font-size: 16px;\"><span style=\"font-size: 16px;\"><span style='display: inline !important; float: none; background-color: transparent; color: rgb(64, 64, 64); font-family: \"Qualtrics Grotesque\",\"Helvetica Neue\",Helvetica,Arial,sans-serif; font-size: 16px; font-style: normal; font-variant: normal; font-weight: 400; letter-spacing: normal; orphans: 2; text-align: left; text-decoration: none; text-indent: 0px; text-transform: none; -webkit-text-stroke-width: 0px; white-space: normal; word-spacing: 0px;'>Please complete the survey based only on&nbsp;the lecture portion of this course for the week specified by your instructor.<\/span><\/span><\/span><\/p>","DefaultChoices":false,"DataExportTag":"Pg19.2","QuestionType":"DB","Selector":"TB","Configuration":{"QuestionDescriptionOption":"UseText"},"QuestionDescription":"Please complete the survey based only on\u00a0the lecture portion of this course for the week specifie...","ChoiceOrder":[],"Validation":{"Settings":{"Type":"None"}},"GradingData":[],"Language":[],"QuestionID":"QID117","DataVisibility":{"Private":false,"Hidden":false},"NextChoiceId":1,"NextAnswerId":1}},{"SurveyID":"SV_bdByXydulCoImrP","Element":"SQ","PrimaryAttribute":"QID118","SecondaryAttribute":"Please complete the survey based only on\u00a0the lecture portion of this course for the week specifie..","TertiaryAttribute":null,"Payload":{"QuestionText":"<p><span style=\"font-size: 16px;\"><span style=\"font-size: 16px;\"><span style='display: inline !important; float: none; background-color: transparent; color: rgb(64, 64, 64); font-family: \"Qualtrics Grotesque\",\"Helvetica Neue\",Helvetica,Arial,sans-serif; font-size: 16px; font-style: normal; font-variant: normal; font-weight: 400; letter-spacing: normal; orphans: 2; text-align: left; text-decoration: none; text-indent: 0px; text-transform: none; -webkit-text-stroke-width: 0px; white-space: normal; word-spacing: 0px;'>Please complete the survey based only on&nbsp;the lecture portion of this course for the week specified by your instructor.<\/span><\/span><\/span><\/p>","DefaultChoices":false,"DataExportTag":"Pg20.2","QuestionType":"DB","Selector":"TB","Configuration":{"QuestionDescriptionOption":"UseText"},"QuestionDescription":"Please complete the survey based only on\u00a0the lecture portion of this course for the week specifie...","ChoiceOrder":[],"Validation":{"Settings":{"Type":"None"}},"GradingData":[],"Language":[],"QuestionID":"QID118","DataVisibility":{"Private":false,"Hidden":false},"NextChoiceId":1,"NextAnswerId":1}},{"SurveyID":"SV_bdByXydulCoImrP","Element":"SQ","PrimaryAttribute":"QID119","SecondaryAttribute":"Please complete the survey based only on\u00a0the lecture portion of this course for the week specifie..","TertiaryAttribute":null,"Payload":{"QuestionText":"<p><span style=\"font-size: 16px;\"><span style=\"font-size: 16px;\"><span style='text-align: left; color: rgb(64, 64, 64); text-transform: none; text-indent: 0px; letter-spacing: normal; font-family: \"Qualtrics Grotesque\",\"Helvetica Neue\",Helvetica,Arial,sans-serif; font-size: 16px; font-variant: normal; word-spacing: 0px; display: inline !important; white-space: normal; orphans: 2; float: none; -webkit-text-stroke-width: 0px; background-color: transparent;'><span style='display: inline !important; float: none; background-color: transparent; color: rgb(64, 64, 64); font-family: \"Qualtrics Grotesque\",\"Helvetica Neue\",Helvetica,Arial,sans-serif; font-size: 16px; font-style: normal; font-variant: normal; font-weight: 400; letter-spacing: normal; orphans: 2; text-align: left; text-decoration: none; text-indent: 0px; text-transform: none; -webkit-text-stroke-width: 0px; white-space: normal; word-spacing: 0px;'>Please complete the survey based only on&nbsp;the lecture portion of this course for the week specified by your instructor.<\/span><\/span><\/span><\/span><\/p>","DefaultChoices":false,"DataExportTag":"Pg21.2","QuestionType":"DB","Selector":"TB","Configuration":{"QuestionDescriptionOption":"UseText"},"QuestionDescription":"Please complete the survey based only on\u00a0the lecture portion of this course for the week specifie...","ChoiceOrder":[],"Validation":{"Settings":{"Type":"None"}},"GradingData":[],"Language":[],"QuestionID":"QID119","DataVisibility":{"Private":false,"Hidden":false},"NextChoiceId":1,"NextAnswerId":1}},{"SurveyID":"SV_bdByXydulCoImrP","Element":"SQ","PrimaryAttribute":"QID120","SecondaryAttribute":"Please complete the survey based only on\u00a0the lecture portion of this course for the week specifie..","TertiaryAttribute":null,"Payload":{"QuestionText":"<span style=\"font-size: 16px;\"><span style=\"font-size: 16px;\"><span style='display: inline !important; float: none; background-color: transparent; color: rgb(64, 64, 64); font-family: \"Qualtrics Grotesque\",\"Helvetica Neue\",Helvetica,Arial,sans-serif; font-size: 16px; font-style: normal; font-variant: normal; font-weight: 400; letter-spacing: normal; orphans: 2; text-align: left; text-decoration: none; text-indent: 0px; text-transform: none; -webkit-text-stroke-width: 0px; white-space: normal; word-spacing: 0px;'>Please complete the survey based only on&nbsp;the lecture portion of this course for the week specified by your instructor.<\/span><\/span><\/span>","DefaultChoices":false,"DataExportTag":"Pg22.2","QuestionType":"DB","Selector":"TB","Configuration":{"QuestionDescriptionOption":"UseText"},"QuestionDescription":"Please complete the survey based only on\u00a0the lecture portion of this course for the week specifie...","ChoiceOrder":[],"Validation":{"Settings":{"Type":"None"}},"GradingData":[],"Language":[],"QuestionID":"QID120","DataVisibility":{"Private":false,"Hidden":false},"NextChoiceId":1,"NextAnswerId":1}},{"SurveyID":"SV_bdByXydulCoImrP","Element":"SQ","PrimaryAttribute":"QID121","SecondaryAttribute":"Please complete the survey based only on\u00a0the lecture portion of this course for the week specifie..","TertiaryAttribute":null,"Payload":{"QuestionText":"<span style=\"font-size: 16px;\"><span style='display: inline !important; float: none; background-color: transparent; color: rgb(64, 64, 64); font-family: \"Qualtrics Grotesque\",\"Helvetica Neue\",Helvetica,Arial,sans-serif; font-size: 16px; font-style: normal; font-variant: normal; font-weight: 400; letter-spacing: normal; orphans: 2; text-align: left; text-decoration: none; text-indent: 0px; text-transform: none; -webkit-text-stroke-width: 0px; white-space: normal; word-spacing: 0px;'>Please complete the survey based only on&nbsp;the lecture portion of this course for the week specified by your instructor.<\/span><\/span>","DefaultChoices":false,"DataExportTag":"Pg23.2","QuestionType":"DB","Selector":"TB","Configuration":{"QuestionDescriptionOption":"UseText"},"QuestionDescription":"Please complete the survey based only on\u00a0the lecture portion of this course for the week specifie...","ChoiceOrder":[],"Validation":{"Settings":{"Type":"None"}},"GradingData":[],"Language":[],"QuestionID":"QID121","DataVisibility":{"Private":false,"Hidden":false},"NextChoiceId":1,"NextAnswerId":1}},{"SurveyID":"SV_bdByXydulCoImrP","Element":"SQ","PrimaryAttribute":"QID128","SecondaryAttribute":"Please complete the survey based only on\u00a0the lecture portion of this course for the week specifie..","TertiaryAttribute":null,"Payload":{"QuestionText":"<span style=\"font-size: 16px;\"><span style='text-align: left; color: rgb(64, 64, 64); text-transform: none; text-indent: 0px; letter-spacing: normal; font-family: \"Qualtrics Grotesque\",\"Helvetica Neue\",Helvetica,Arial,sans-serif; font-size: 16px; font-style: normal; font-variant: normal; text-decoration: none; word-spacing: 0px; display: inline !important; white-space: normal; orphans: 2; float: none; -webkit-text-stroke-width: 0px; background-color: transparent;'>Please complete the survey based only on&nbsp;the lecture portion of this course for the week specified by your instructor.<\/span><\/span>","DefaultChoices":false,"DataExportTag":"Pg3.2","QuestionID":"QID128","QuestionType":"DB","Selector":"TB","Configuration":{"QuestionDescriptionOption":"UseText"},"QuestionDescription":"Please complete the survey based only on\u00a0the lecture portion of this course for the week specifie...","ChoiceOrder":[],"Validation":{"Settings":{"Type":"None"}},"GradingData":[],"Language":[],"DataVisibility":{"Private":false,"Hidden":false},"NextChoiceId":1,"NextAnswerId":1}},{"SurveyID":"SV_bdByXydulCoImrP","Element":"SQ","PrimaryAttribute":"QID129","SecondaryAttribute":"Please complete the survey based only on\u00a0the lecture portion of this course for the week specifie..","TertiaryAttribute":null,"Payload":{"QuestionText":"<span style='display: inline !important; float: none; background-color: transparent; color: rgb(64, 64, 64); font-family: \"Qualtrics Grotesque\",\"Helvetica Neue\",Helvetica,Arial,sans-serif; font-size: 16px; font-style: normal; font-variant: normal; font-weight: 400; letter-spacing: normal; orphans: 2; text-align: left; text-decoration: none; text-indent: 0px; text-transform: none; -webkit-text-stroke-width: 0px; white-space: normal; word-spacing: 0px;'>Please complete the survey based only on&nbsp;the lecture portion of this course for the week specified by your instructor.<\/span>","DefaultChoices":false,"DataExportTag":"Pg4.2","QuestionType":"DB","Selector":"TB","Configuration":{"QuestionDescriptionOption":"UseText"},"QuestionDescription":"Please complete the survey based only on\u00a0the lecture portion of this course for the week specifie...","ChoiceOrder":[],"Validation":{"Settings":{"Type":"None"}},"GradingData":[],"Language":[],"QuestionID":"QID129","DataVisibility":{"Private":false,"Hidden":false},"NextChoiceId":1,"NextAnswerId":1}},{"SurveyID":"SV_bdByXydulCoImrP","Element":"SQ","PrimaryAttribute":"QID131","SecondaryAttribute":"Please complete the survey based only on\u00a0the lecture portion of this course for the week specifie..","TertiaryAttribute":null,"Payload":{"QuestionText":"<span style=\"font-size: 16px;\"><span style='display: inline !important; float: none; background-color: transparent; color: rgb(64, 64, 64); font-family: \"Qualtrics Grotesque\",\"Helvetica Neue\",Helvetica,Arial,sans-serif; font-size: 16px; font-style: normal; font-variant: normal; font-weight: 400; letter-spacing: normal; orphans: 2; text-align: left; text-decoration: none; text-indent: 0px; text-transform: none; -webkit-text-stroke-width: 0px; white-space: normal; word-spacing: 0px;'>Please complete the survey based only on&nbsp;the lecture portion of this course for the week specified by your instructor.<\/span><\/span>","DefaultChoices":false,"DataExportTag":"Pg6.2","QuestionType":"DB","Selector":"TB","Configuration":{"QuestionDescriptionOption":"UseText"},"QuestionDescription":"Please complete the survey based only on\u00a0the lecture portion of this course for the week specifie...","ChoiceOrder":[],"Validation":{"Settings":{"Type":"None"}},"GradingData":[],"Language":[],"QuestionID":"QID131","DataVisibility":{"Private":false,"Hidden":false},"NextChoiceId":1,"NextAnswerId":1}},{"SurveyID":"SV_bdByXydulCoImrP","Element":"SQ","PrimaryAttribute":"QID132","SecondaryAttribute":"Please complete the survey based only on\u00a0the lecture portion of this course for the week specifie..","TertiaryAttribute":null,"Payload":{"QuestionText":"<span style=\"font-size: 16px;\"><span style='display: inline !important; float: none; background-color: transparent; color: rgb(64, 64, 64); font-family: \"Qualtrics Grotesque\",\"Helvetica Neue\",Helvetica,Arial,sans-serif; font-size: 16px; font-style: normal; font-variant: normal; font-weight: 400; letter-spacing: normal; orphans: 2; text-align: left; text-decoration: none; text-indent: 0px; text-transform: none; -webkit-text-stroke-width: 0px; white-space: normal; word-spacing: 0px;'>Please complete the survey based only on&nbsp;the lecture portion of this course for the week specified by your instructor.<\/span><\/span>","DefaultChoices":false,"DataExportTag":"Pg7.2","QuestionType":"DB","Selector":"TB","Configuration":{"QuestionDescriptionOption":"UseText"},"QuestionDescription":"Please complete the survey based only on\u00a0the lecture portion of this course for the week specifie...","ChoiceOrder":[],"Validation":{"Settings":{"Type":"None"}},"GradingData":[],"Language":[],"QuestionID":"QID132","DataVisibility":{"Private":false,"Hidden":false},"NextChoiceId":1,"NextAnswerId":1}},{"SurveyID":"SV_bdByXydulCoImrP","Element":"SQ","PrimaryAttribute":"QID133","SecondaryAttribute":"Please complete the survey based only on\u00a0the lecture portion of this course for the week specifie..","TertiaryAttribute":null,"Payload":{"QuestionText":"<span style=\"font-size: 16px;\"><span style='display: inline !important; float: none; background-color: transparent; color: rgb(64, 64, 64); font-family: \"Qualtrics Grotesque\",\"Helvetica Neue\",Helvetica,Arial,sans-serif; font-size: 16px; font-style: normal; font-variant: normal; font-weight: 400; letter-spacing: normal; orphans: 2; text-align: left; text-decoration: none; text-indent: 0px; text-transform: none; -webkit-text-stroke-width: 0px; white-space: normal; word-spacing: 0px;'>Please complete the survey based only on&nbsp;the lecture portion of this course for the week specified by your instructor.<\/span><\/span>","DefaultChoices":false,"DataExportTag":"Pg8.2","QuestionType":"DB","Selector":"TB","Configuration":{"QuestionDescriptionOption":"UseText"},"QuestionDescription":"Please complete the survey based only on\u00a0the lecture portion of this course for the week specifie...","ChoiceOrder":[],"Validation":{"Settings":{"Type":"None"}},"GradingData":[],"Language":[],"QuestionID":"QID133","DataVisibility":{"Private":false,"Hidden":false},"NextChoiceId":1,"NextAnswerId":1}},{"SurveyID":"SV_bdByXydulCoImrP","Element":"SQ","PrimaryAttribute":"QID134","SecondaryAttribute":"Please complete the survey based only on\u00a0the lecture portion of this course for the week specifie..","TertiaryAttribute":null,"Payload":{"QuestionText":"<span style=\"font-size: 16px;\"><span style='display: inline !important; float: none; background-color: transparent; color: rgb(64, 64, 64); font-family: \"Qualtrics Grotesque\",\"Helvetica Neue\",Helvetica,Arial,sans-serif; font-size: 16px; font-style: normal; font-variant: normal; font-weight: 400; letter-spacing: normal; orphans: 2; text-align: left; text-decoration: none; text-indent: 0px; text-transform: none; -webkit-text-stroke-width: 0px; white-space: normal; word-spacing: 0px;'>Please complete the survey based only on&nbsp;the lecture portion of this course for the week specified by your instructor.<\/span><\/span>","DefaultChoices":false,"DataExportTag":"Pg9.2","QuestionType":"DB","Selector":"TB","Configuration":{"QuestionDescriptionOption":"UseText"},"QuestionDescription":"Please complete the survey based only on\u00a0the lecture portion of this course for the week specifie...","ChoiceOrder":[],"Validation":{"Settings":{"Type":"None"}},"GradingData":[],"Language":[],"QuestionID":"QID134","DataVisibility":{"Private":false,"Hidden":false},"NextChoiceId":1,"NextAnswerId":1}},{"SurveyID":"SV_bdByXydulCoImrP","Element":"SQ","PrimaryAttribute":"QID135","SecondaryAttribute":"Please complete the survey based only on\u00a0the lecture portion of this course for the week specifie..","TertiaryAttribute":null,"Payload":{"QuestionText":"<span style=\"font-size: 16px;\"><span style='display: inline !important; float: none; background-color: transparent; color: rgb(64, 64, 64); font-family: \"Qualtrics Grotesque\",\"Helvetica Neue\",Helvetica,Arial,sans-serif; font-size: 16px; font-style: normal; font-variant: normal; font-weight: 400; letter-spacing: normal; orphans: 2; text-align: left; text-decoration: none; text-indent: 0px; text-transform: none; -webkit-text-stroke-width: 0px; white-space: normal; word-spacing: 0px;'>Please complete the survey based only on&nbsp;the lecture portion of this course for the week specified by your instructor.<\/span><\/span>","DefaultChoices":false,"DataExportTag":"Pg10.2","QuestionType":"DB","Selector":"TB","Configuration":{"QuestionDescriptionOption":"UseText"},"QuestionDescription":"Please complete the survey based only on\u00a0the lecture portion of this course for the week specifie...","ChoiceOrder":[],"Validation":{"Settings":{"Type":"None"}},"GradingData":[],"Language":[],"QuestionID":"QID135","DataVisibility":{"Private":false,"Hidden":false},"NextChoiceId":1,"NextAnswerId":1}},{"SurveyID":"SV_bdByXydulCoImrP","Element":"SQ","PrimaryAttribute":"QID136","SecondaryAttribute":"Please complete the survey based only on\u00a0the lecture portion of this course for the week specifie..","TertiaryAttribute":null,"Payload":{"QuestionText":"<span style=\"font-size: 16px;\"><span style='display: inline !important; float: none; background-color: transparent; color: rgb(64, 64, 64); font-family: \"Qualtrics Grotesque\",\"Helvetica Neue\",Helvetica,Arial,sans-serif; font-size: 16px; font-style: normal; font-variant: normal; font-weight: 400; letter-spacing: normal; orphans: 2; text-align: left; text-decoration: none; text-indent: 0px; text-transform: none; -webkit-text-stroke-width: 0px; white-space: normal; word-spacing: 0px;'>Please complete the survey based only on&nbsp;the lecture portion of this course for the week specified by your instructor.<\/span><\/span>","DefaultChoices":false,"DataExportTag":"Pg11.2","QuestionType":"DB","Selector":"TB","Configuration":{"QuestionDescriptionOption":"UseText"},"QuestionDescription":"Please complete the survey based only on\u00a0the lecture portion of this course for the week specifie...","ChoiceOrder":[],"Validation":{"Settings":{"Type":"None"}},"GradingData":[],"Language":[],"QuestionID":"QID136","DataVisibility":{"Private":false,"Hidden":false},"NextChoiceId":1,"NextAnswerId":1}},{"SurveyID":"SV_bdByXydulCoImrP","Element":"SQ","PrimaryAttribute":"QID137","SecondaryAttribute":"Please complete the survey based only on\u00a0the lecture portion of this course for the week specifie..","TertiaryAttribute":null,"Payload":{"QuestionText":"<span style=\"font-size: 16px;\"><span style='display: inline !important; float: none; background-color: transparent; color: rgb(64, 64, 64); font-family: \"Qualtrics Grotesque\",\"Helvetica Neue\",Helvetica,Arial,sans-serif; font-size: 16px; font-style: normal; font-variant: normal; font-weight: 400; letter-spacing: normal; orphans: 2; text-align: left; text-decoration: none; text-indent: 0px; text-transform: none; -webkit-text-stroke-width: 0px; white-space: normal; word-spacing: 0px;'>Please complete the survey based only on&nbsp;the lecture portion of this course for the week specified by your instructor.<\/span><\/span>","DefaultChoices":false,"DataExportTag":"Pg12.2","QuestionType":"DB","Selector":"TB","Configuration":{"QuestionDescriptionOption":"UseText"},"QuestionDescription":"Please complete the survey based only on\u00a0the lecture portion of this course for the week specifie...","ChoiceOrder":[],"Validation":{"Settings":{"Type":"None"}},"GradingData":[],"Language":[],"QuestionID":"QID137","DataVisibility":{"Private":false,"Hidden":false},"NextChoiceId":1,"NextAnswerId":1}},{"SurveyID":"SV_bdByXydulCoImrP","Element":"SQ","PrimaryAttribute":"QID138","SecondaryAttribute":"Please complete the survey based only on\u00a0the lecture portion of this course for the week specifie..","TertiaryAttribute":null,"Payload":{"QuestionText":"<span style=\"font-size: 16px;\"><span style='display: inline !important; float: none; background-color: transparent; color: rgb(64, 64, 64); font-family: \"Qualtrics Grotesque\",\"Helvetica Neue\",Helvetica,Arial,sans-serif; font-size: 16px; font-style: normal; font-variant: normal; font-weight: 400; letter-spacing: normal; orphans: 2; text-align: left; text-decoration: none; text-indent: 0px; text-transform: none; -webkit-text-stroke-width: 0px; white-space: normal; word-spacing: 0px;'>Please complete the survey based only on&nbsp;the lecture portion of this course for the week specified by your instructor.<\/span><\/span>","DefaultChoices":false,"DataExportTag":"Pg13.2","QuestionType":"DB","Selector":"TB","Configuration":{"QuestionDescriptionOption":"UseText"},"QuestionDescription":"Please complete the survey based only on\u00a0the lecture portion of this course for the week specifie...","ChoiceOrder":[],"Validation":{"Settings":{"Type":"None"}},"GradingData":[],"Language":[],"QuestionID":"QID138","DataVisibility":{"Private":false,"Hidden":false},"NextChoiceId":1,"NextAnswerId":1}},{"SurveyID":"SV_bdByXydulCoImrP","Element":"SQ","PrimaryAttribute":"QID140","SecondaryAttribute":"Please complete the survey based only on\u00a0the lecture portion of this course for the week specifie..","TertiaryAttribute":null,"Payload":{"QuestionText":"<span style=\"font-size: 16px;\"><span style='display: inline !important; float: none; background-color: transparent; color: rgb(64, 64, 64); font-family: \"Qualtrics Grotesque\",\"Helvetica Neue\",Helvetica,Arial,sans-serif; font-size: 16px; font-style: normal; font-variant: normal; font-weight: 400; letter-spacing: normal; orphans: 2; text-align: left; text-decoration: none; text-indent: 0px; text-transform: none; -webkit-text-stroke-width: 0px; white-space: normal; word-spacing: 0px;'>Please complete the survey based only on&nbsp;the lecture portion of this course for the week specified by your instructor.<\/span><\/span>","DefaultChoices":false,"DataExportTag":"Pg14.2","QuestionType":"DB","Selector":"TB","Configuration":{"QuestionDescriptionOption":"UseText"},"QuestionDescription":"Please complete the survey based only on\u00a0the lecture portion of this course for the week specifie...","ChoiceOrder":[],"Validation":{"Settings":{"Type":"None"}},"GradingData":[],"Language":[],"QuestionID":"QID140","DataVisibility":{"Private":false,"Hidden":false},"NextChoiceId":1,"NextAnswerId":1}},{"SurveyID":"SV_bdByXydulCoImrP","Element":"SQ","PrimaryAttribute":"QID185","SecondaryAttribute":"Please complete the survey based only on\u00a0the lecture portion of this course for the week specifie..","TertiaryAttribute":null,"Payload":{"QuestionText":"<span style=\"font-size: 16px;\"><span style='display: inline !important; float: none; background-color: transparent; color: rgb(64, 64, 64); font-family: \"Qualtrics Grotesque\",\"Helvetica Neue\",Helvetica,Arial,sans-serif; font-size: 16px; font-style: normal; font-variant: normal; font-weight: 400; letter-spacing: normal; orphans: 2; text-align: left; text-decoration: none; text-indent: 0px; text-transform: none; -webkit-text-stroke-width: 0px; white-space: normal; word-spacing: 0px;'>Please complete the survey based only on&nbsp;the lecture portion of this course for the week specified by your instructor.<\/span><\/span>","DefaultChoices":false,"DataExportTag":"Pg14.3","QuestionType":"DB","Selector":"TB","DataVisibility":{"Private":false,"Hidden":false},"Configuration":{"QuestionDescriptionOption":"UseText"},"QuestionDescription":"Please complete the survey based only on\u00a0the lecture portion of this course for the week specifie...","ChoiceOrder":[],"Validation":{"Settings":{"Type":"None"}},"GradingData":[],"Language":[],"NextChoiceId":1,"NextAnswerId":1,"QuestionID":"QID185"}},{"SurveyID":"SV_bdByXydulCoImrP","Element":"SQ","PrimaryAttribute":"QID130","SecondaryAttribute":"Please complete the survey based only on\u00a0the lecture portion of this course.","TertiaryAttribute":null,"Payload":{"QuestionText":"<span style=\"font-size: 16px;\">Please complete the survey based only on&nbsp;the lecture portion of this course.<\/span>","DefaultChoices":false,"DataExportTag":"Pg5.2","QuestionType":"DB","Selector":"TB","Configuration":{"QuestionDescriptionOption":"UseText"},"QuestionDescription":"Please complete the survey based only on\u00a0the lecture portion of this course.","ChoiceOrder":[],"Validation":{"Settings":{"Type":"None"}},"GradingData":[],"Language":[],"QuestionID":"QID130"}},{"SurveyID":"SV_bdByXydulCoImrP","Element":"SQ","PrimaryAttribute":"QID102","SecondaryAttribute":"Please provide any additional feedback or comments about this course or any of your survey respon...","TertiaryAttribute":null,"Payload":{"QuestionText":"<p><span style=\"font-size: 16px;\">Please provide any additional feedback or comments about this course or any of your survey responses that you would like to share&nbsp;(optional):<\/span><\/p>","DefaultChoices":false,"DataExportTag":"Open","QuestionType":"TE","Selector":"ESTB","Configuration":{"QuestionDescriptionOption":"UseText"},"QuestionDescription":"Please provide any additional feedback or comments about this course or any of your survey respon...","Validation":{"Settings":{"ForceResponse":"OFF","ForceResponseType":"ON","Type":"None"}},"GradingData":[],"Language":[],"QuestionID":"QID102"}},{"SurveyID":"SV_bdByXydulCoImrP","Element":"SQ","PrimaryAttribute":"QID3","SecondaryAttribute":"Polling methods include clickers, Poll Anywhere, Learning Catalytics, colored cards,\u00a0or other aud..","TertiaryAttribute":null,"Payload":{"QuestionText":"<p><em><span style=\"font-size: 16px;\"><strong>Polling methods <\/strong>include clickers, Poll Anywhere, Learning Catalytics, colored cards,&nbsp;or other audience response systems&nbsp;that are used to determine how many students answer a question in a particular way. <\/span><\/em><\/p>\n\n<p>&nbsp;<\/p>\n\n<p><span style=\"font-size: 16px;\">Students were asked to use a <strong>polling method<\/strong> to answer questions in the classroom approximately:<\/span><\/p>","DefaultChoices":false,"DataExportTag":"Q3","QuestionType":"MC","Selector":"SAHR","SubSelector":"TX","Configuration":{"QuestionDescriptionOption":"UseText","LabelPosition":"BELOW"},"QuestionDescription":"Polling methods include clickers, Poll Anywhere, Learning Catalytics, colored cards,\u00a0or other aud...","Choices":{"1":{"Display":"<span style=\"font-size: 13px;\">zero questions<\/span>"},"3":{"Display":"<span style=\"font-size: 13px;\">up to 1 question<br>per week<\/span>"},"4":{"Display":"<span style=\"font-size: 13px;\">2-3 questions<br>per week<\/span>"},"5":{"Display":"<span style=\"font-size: 13px;\">4-5  questions<br>per week<\/span>"},"6":{"Display":"<span style=\"font-size: 13px;\">more than 10 questions<br>per week<\/span>"},"8":{"Display":"<span style=\"font-size: 13px;\">6-10 questions<br>per week<\/span>"}},"ChoiceOrder":[1,3,4,5,"8",6],"Validation":{"Settings":{"ForceResponse":"OFF","ForceResponseType":"ON","Type":"None"}},"GradingData":[],"Language":[],"QuestionID":"QID3","RecodeValues":{"1":"0","3":"1","4":"2","5":"3","6":"5","8":"4"},"DataVisibility":{"Private":false,"Hidden":false},"NextChoiceId":10,"NextAnswerId":1}},{"SurveyID":"SV_bdByXydulCoImrP","Element":"SQ","PrimaryAttribute":"QID26","SecondaryAttribute":"Student feedback on course activities\u00a0and content was used to\u00a0make adjustments to\u00a0the course with","TertiaryAttribute":null,"Payload":{"QuestionText":"<span style=\"font-size: 16px;\">Student feedback on course activities&nbsp;and content was used to&nbsp;make adjustments to&nbsp;the course <u>within the semester<\/u>:<\/span>","DefaultChoices":false,"DataExportTag":"Q28","QuestionID":"QID26","QuestionType":"MC","Selector":"SAHR","SubSelector":"TX","Configuration":{"QuestionDescriptionOption":"UseText","LabelPosition":"BELOW"},"QuestionDescription":"Student feedback on course activities\u00a0and content was used to\u00a0make adjustments to\u00a0the course with...","Choices":{"1":{"Display":"<span style=\"font-size: 13px;\">none of the time that<br>feedback was collected<\/span>"},"2":{"Display":"<span style=\"font-size: 13px;\">some of the time that<br>feedback was collected<\/span>"},"3":{"Display":"<span style=\"font-size: 13px;\">every time that<br>feedback was collected<\/span>"}},"ChoiceOrder":["1","2","3"],"Validation":{"Settings":{"ForceResponse":"OFF","ForceResponseType":"ON","Type":"None"}},"GradingData":[],"AnalyzeChoices":{"31":"on"},"Language":[],"DynamicChoicesData":[],"RecodeValues":{"1":"0","2":"1","3":"2"},"DisplayLogic":{"0":{"0":{"LogicType":"Question","QuestionID":"QID25","QuestionIsInLoop":"no","ChoiceLocator":"q:\/\/QID25\/SelectableChoice\/12","Operator":"NotSelected","QuestionIDFromLocator":"QID25","LeftOperand":"q:\/\/QID25\/SelectableChoice\/12","Type":"Expression","Description":"<span class=\"ConjDesc\">If<\/span> <span class=\"QuestionDesc\">Students were asked to provide formal or informal&nbsp;feedback on course activities and content prior...<\/span> <span class=\"LeftOpDesc\">&lt;span style=\"font-size:13px;\"&gt;zero times&lt;\/span&gt;<\/span> Is <span class=\"OpDesc\">Not Selected<\/span> "},"Type":"If"},"Type":"BooleanExpression","inPage":false}}},{"SurveyID":"SV_bdByXydulCoImrP","Element":"SQ","PrimaryAttribute":"QID43","SecondaryAttribute":"Students engaged in higher level thought processes that required them to apply, analyze, incorpor...","TertiaryAttribute":null,"Payload":{"QuestionText":"<span style=\"font-size: 16px;\">Students engaged in higher level thought processes that required them to apply, analyze, incorporate, or evaluate their knowledge or skills rather than just memorizing facts or processes approximately:<\/span>","DefaultChoices":false,"DataExportTag":"Q33","QuestionType":"MC","Selector":"SAHR","SubSelector":"TX","Configuration":{"QuestionDescriptionOption":"UseText","LabelPosition":"BELOW"},"QuestionDescription":"Students engaged in higher level thought processes that required them to apply, analyze, incorpor...","Choices":[],"ChoiceOrder":[],"Validation":{"Settings":{"ForceResponse":"OFF","ForceResponseType":"ON","Type":"None"}},"GradingData":[],"Language":[],"QuestionID":"QID43","DynamicChoices":{"DynamicType":"ChoiceGroup","Locator":"q:\/\/QID15\/ChoiceGroup\/AllChoices?displayLogic=0","Type":"Dynamic","Description":"Displayed Choices"},"DynamicChoicesData":[],"RecodeValues":{"x1":"0","x5":"1","x6":"2","x7":"3"},"DataVisibility":{"Private":false,"Hidden":false},"NextChoiceId":1,"NextAnswerId":1}},{"SurveyID":"SV_bdByXydulCoImrP","Element":"SQ","PrimaryAttribute":"QID37","SecondaryAttribute":"Students were asked to analyze or interpret scientific data shown in graphs or tables approximately:","TertiaryAttribute":null,"Payload":{"QuestionText":"<span style=\"font-size: 16px;\">Students were asked to analyze or interpret scientific data shown in graphs or tables approximately:<\/span>","DefaultChoices":false,"DataExportTag":"Q24","QuestionType":"MC","Selector":"SAHR","SubSelector":"TX","Configuration":{"QuestionDescriptionOption":"UseText","LabelPosition":"BELOW"},"QuestionDescription":"Students were asked to analyze or interpret scientific data shown in graphs or tables approximately:","Choices":[],"ChoiceOrder":[],"Validation":{"Settings":{"ForceResponse":"OFF","ForceResponseType":"ON","Type":"None"}},"GradingData":[],"Language":[],"QuestionID":"QID37","DynamicChoices":{"DynamicType":"ChoiceGroup","Locator":"q:\/\/QID15\/ChoiceGroup\/AllChoices?displayLogic=0","Type":"Dynamic","Description":"All Choices - Displayed & Hidden"},"DynamicChoicesData":[],"RecodeValues":{"x1":"0","x5":"1","x6":"2","x7":"3"},"DataVisibility":{"Private":false,"Hidden":false},"NextChoiceId":1,"NextAnswerId":1}},{"SurveyID":"SV_bdByXydulCoImrP","Element":"SQ","PrimaryAttribute":"QID20","SecondaryAttribute":"Students were asked to comment\u00a0or make suggestions on each other's work on class assignments, act..","TertiaryAttribute":null,"Payload":{"QuestionText":"<span style=\"font-size: 16px;\">Students were asked to comment&nbsp;or make suggestions on each other's work on class assignments, activities, or projects approximately:<\/span>","DefaultChoices":false,"DataExportTag":"Q12","QuestionID":"QID20","QuestionType":"MC","Selector":"SAHR","SubSelector":"TX","Configuration":{"QuestionDescriptionOption":"UseText","LabelPosition":"BELOW"},"QuestionDescription":"Students were asked to comment\u00a0or make suggestions on each other's work on class assignments, act...","Choices":[],"ChoiceOrder":[],"Validation":{"Settings":{"ForceResponse":"OFF","ForceResponseType":"ON","Type":"None"}},"GradingData":[],"Language":[],"DynamicChoices":{"DynamicType":"ChoiceGroup","Locator":"q:\/\/QID15\/ChoiceGroup\/AllChoices?displayLogic=0","Type":"Dynamic","Description":"Displayed Choices"},"DynamicChoicesData":[],"RecodeValues":{"x1":"0","x5":"1","x6":"2","x7":"3"},"DataVisibility":{"Private":false,"Hidden":false},"NextChoiceId":1,"NextAnswerId":1}},{"SurveyID":"SV_bdByXydulCoImrP","Element":"SQ","PrimaryAttribute":"QID41","SecondaryAttribute":"Students were asked to communicate scientific ideas in formal written papers or oral presentation...","TertiaryAttribute":null,"Payload":{"QuestionText":"<span style=\"font-size: 16px;\">Students were asked to communicate scientific ideas in formal written papers or oral presentations approximately:<\/span>","DefaultChoices":false,"DataExportTag":"Q28","QuestionType":"MC","Selector":"SAHR","SubSelector":"TX","Configuration":{"QuestionDescriptionOption":"UseText","LabelPosition":"BELOW"},"QuestionDescription":"Students were asked to communicate scientific ideas in formal written papers or oral presentation...","Choices":[],"ChoiceOrder":[],"Validation":{"Settings":{"ForceResponse":"OFF","ForceResponseType":"ON","Type":"None"}},"GradingData":[],"Language":[],"QuestionID":"QID41","DynamicChoices":{"DynamicType":"ChoiceGroup","Locator":"q:\/\/QID15\/ChoiceGroup\/AllChoices?displayLogic=0","Type":"Dynamic","Description":"All Choices - Displayed & Hidden"},"DynamicChoicesData":[],"RecodeValues":{"x1":"0","x5":"1","x6":"2","x7":"3"},"DataVisibility":{"Private":false,"Hidden":false},"NextChoiceId":1,"NextAnswerId":1}},{"SurveyID":"SV_bdByXydulCoImrP","Element":"SQ","PrimaryAttribute":"QID12","SecondaryAttribute":"Students were asked to complete major exams or term projects, including final exams\u00a0approximately:","TertiaryAttribute":null,"Payload":{"QuestionText":"<span style=\"font-size: 16px;\">Students were asked to complete<strong> major exams or term projects<\/strong>, including final exams&nbsp;approximately:<\/span>","DefaultChoices":false,"DataExportTag":"Q12","QuestionType":"MC","Selector":"SAHR","SubSelector":"TX","Configuration":{"QuestionDescriptionOption":"UseText","LabelPosition":"BELOW"},"QuestionDescription":"Students were asked to complete major exams or term projects, including final exams\u00a0approximately:","Choices":{"1":{"Display":"<span style=\"font-size:13px;\">zero times<\/span>"},"2":{"Display":"<span style=\"font-size:13px;\">1 time<br \/>\nduring the semester<\/span>"},"3":{"Display":"<span style=\"font-size:13px;\">2 times<br \/>\nduring the semester<\/span>"},"4":{"Display":"<span style=\"font-size:13px;\">3 times<br \/>\nduring the semester<\/span>"},"5":{"Display":"<span style=\"font-size:13px;\">4 times<br \/>\nduring the semester<\/span>"},"6":{"Display":"<span style=\"font-size:13px;\">5 times<br \/>\nduring the semester<\/span>"},"7":{"Display":"<span style=\"font-size:13px;\">6 or more times<br \/>\nduring the semester<\/span>"}},"ChoiceOrder":[1,2,3,4,5,6,7],"Validation":{"Settings":{"ForceResponse":"OFF","ForceResponseType":"ON","Type":"None"}},"GradingData":[],"Language":[],"QuestionID":"QID12","RecodeValues":{"1":"0","2":"1","3":"2","4":"3","5":"4","6":"5","7":"6"}}},{"SurveyID":"SV_bdByXydulCoImrP","Element":"SQ","PrimaryAttribute":"QID34","SecondaryAttribute":"Students were asked to critique scientific hypotheses or experimental strategies approximately:","TertiaryAttribute":null,"Payload":{"QuestionText":"<span style=\"font-size: 16px;\">Students were asked to critique scientific hypotheses or experimental strategies approximately:<\/span>","DefaultChoices":false,"DataExportTag":"Q20","QuestionID":"QID34","QuestionType":"MC","Selector":"SAHR","SubSelector":"TX","Configuration":{"QuestionDescriptionOption":"UseText","LabelPosition":"BELOW"},"QuestionDescription":"Students were asked to critique scientific hypotheses or experimental strategies approximately:","Choices":[],"DynamicChoices":{"DynamicType":"ChoiceGroup","Locator":"q:\/\/QID15\/ChoiceGroup\/AllChoices?displayLogic=0","Type":"Dynamic","Description":"All Choices - Displayed & Hidden"},"DynamicChoicesData":[],"ChoiceOrder":[],"Validation":{"Settings":{"ForceResponse":"OFF","ForceResponseType":"ON","Type":"None"}},"GradingData":[],"Language":[],"RecodeValues":{"x1":"0","x5":"1","x6":"2","x7":"3"},"DataVisibility":{"Private":false,"Hidden":false},"NextChoiceId":1,"NextAnswerId":1}},{"SurveyID":"SV_bdByXydulCoImrP","Element":"SQ","PrimaryAttribute":"QID33","SecondaryAttribute":"Students were asked to design experiments to answer scientific questions approximately:","TertiaryAttribute":null,"Payload":{"QuestionText":"<span style=\"font-size: 16px;\">Students were asked to design experiments to answer scientific questions approximately:<\/span>","DefaultChoices":false,"DataExportTag":"Q21","QuestionID":"QID33","QuestionType":"MC","Selector":"SAHR","SubSelector":"TX","Configuration":{"QuestionDescriptionOption":"UseText","LabelPosition":"BELOW"},"QuestionDescription":"Students were asked to design experiments to answer scientific questions approximately:","Choices":[],"DynamicChoices":{"DynamicType":"ChoiceGroup","Locator":"q:\/\/QID15\/ChoiceGroup\/AllChoices?displayLogic=0","Type":"Dynamic","Description":"All Choices - Displayed & Hidden"},"DynamicChoicesData":[],"ChoiceOrder":[],"Validation":{"Settings":{"ForceResponse":"OFF","ForceResponseType":"ON","Type":"None"}},"GradingData":[],"Language":[],"RecodeValues":{"x1":"0","x5":"1","x6":"2","x7":"3"},"DataVisibility":{"Private":false,"Hidden":false},"NextChoiceId":1,"NextAnswerId":1}},{"SurveyID":"SV_bdByXydulCoImrP","Element":"SQ","PrimaryAttribute":"QID32","SecondaryAttribute":"Students were asked to identify or formulate hypotheses or make predictions about the results of...","TertiaryAttribute":null,"Payload":{"QuestionText":"<span style=\"font-size: 16px;\">Students were asked to identify or formulate hypotheses or make predictions about the results of demonstrations, experiments, or examples approximately:<\/span>","DefaultChoices":false,"DataExportTag":"Q19","QuestionID":"QID32","QuestionType":"MC","Selector":"SAHR","SubSelector":"TX","Configuration":{"QuestionDescriptionOption":"UseText","LabelPosition":"BELOW"},"QuestionDescription":"Students were asked to identify or formulate hypotheses or make predictions about the results of...","Choices":[],"DynamicChoices":{"DynamicType":"ChoiceGroup","Locator":"q:\/\/QID15\/ChoiceGroup\/AllChoices?displayLogic=0","Type":"Dynamic","Description":"All Choices - Displayed & Hidden"},"DynamicChoicesData":[],"ChoiceOrder":[],"Validation":{"Settings":{"ForceResponse":"OFF","ForceResponseType":"ON","Type":"None"}},"GradingData":[],"Language":[],"RecodeValues":{"x1":"0","x5":"1","x6":"2","x7":"3"},"DataVisibility":{"Private":false,"Hidden":false},"NextChoiceId":1,"NextAnswerId":1}},{"SurveyID":"SV_bdByXydulCoImrP","Element":"SQ","PrimaryAttribute":"QID44","SecondaryAttribute":"Students were asked to interpret\u00a0or represent concepts in\u00a0non-written formats, such as pictures,..","TertiaryAttribute":null,"Payload":{"QuestionText":"<span style=\"font-size: 16px;\">Students were asked to interpret&nbsp;<u>or<\/u> represent concepts in&nbsp;<u>non-written<\/u> formats, such as pictures, diagrams, videos, simulations, role-plays, graphs, mathematical models, etc. approximately:<\/span>","DefaultChoices":false,"DataExportTag":"Q31","QuestionType":"MC","Selector":"SAHR","SubSelector":"TX","Configuration":{"QuestionDescriptionOption":"UseText","LabelPosition":"BELOW"},"QuestionDescription":"Students were asked to interpret\u00a0or represent concepts in\u00a0non-written formats, such as pictures,...","Choices":[],"ChoiceOrder":[],"Validation":{"Settings":{"ForceResponse":"OFF","ForceResponseType":"ON","Type":"None"}},"GradingData":[],"Language":[],"QuestionID":"QID44","DynamicChoicesData":[],"DynamicChoices":{"DynamicType":"ChoiceGroup","Locator":"q:\/\/QID15\/ChoiceGroup\/AllChoices?displayLogic=0","Type":"Dynamic"},"RecodeValues":{"x1":"0","x5":"1","x6":"2","x7":"3"},"DataVisibility":{"Private":false,"Hidden":false},"NextChoiceId":1,"NextAnswerId":1}},{"SurveyID":"SV_bdByXydulCoImrP","Element":"SQ","PrimaryAttribute":"QID36","SecondaryAttribute":"Students were asked to make graphs or tables approximately:","TertiaryAttribute":null,"Payload":{"QuestionText":"<span style=\"font-size: 16px;\">Students were asked to make graphs or tables approximately:<\/span>","DefaultChoices":false,"DataExportTag":"Q23","QuestionType":"MC","Selector":"SAHR","SubSelector":"TX","Configuration":{"QuestionDescriptionOption":"UseText","LabelPosition":"BELOW"},"QuestionDescription":"Students were asked to make graphs or tables approximately:","Choices":[],"ChoiceOrder":[],"Validation":{"Settings":{"ForceResponse":"OFF","ForceResponseType":"ON","Type":"None"}},"GradingData":[],"Language":[],"QuestionID":"QID36","DynamicChoices":{"DynamicType":"ChoiceGroup","Locator":"q:\/\/QID15\/ChoiceGroup\/AllChoices?displayLogic=0","Type":"Dynamic","Description":"All Choices - Displayed & Hidden"},"DynamicChoicesData":[],"RecodeValues":{"x1":"0","x5":"1","x6":"2","x7":"3"},"DataVisibility":{"Private":false,"Hidden":false},"NextChoiceId":1,"NextAnswerId":1}},{"SurveyID":"SV_bdByXydulCoImrP","Element":"SQ","PrimaryAttribute":"QID45","SecondaryAttribute":"Students were asked to participate in open-ended exercises, such as case-studies or questions in...","TertiaryAttribute":null,"Payload":{"QuestionText":"<span style=\"font-size: 16px;\">Students were asked to participate in open-ended exercises, such as case-studies or questions in which multiple correct answers are&nbsp;possible approximately:<\/span>","DefaultChoices":false,"DataExportTag":"Q34","QuestionType":"MC","Selector":"SAHR","SubSelector":"TX","Configuration":{"QuestionDescriptionOption":"UseText","LabelPosition":"BELOW"},"QuestionDescription":"Students were asked to participate in open-ended exercises, such as case-studies or questions in...","Choices":[],"ChoiceOrder":[],"Validation":{"Settings":{"ForceResponse":"OFF","ForceResponseType":"ON","Type":"None"}},"GradingData":[],"Language":[],"QuestionID":"QID45","DynamicChoices":{"DynamicType":"ChoiceGroup","Locator":"q:\/\/QID15\/ChoiceGroup\/AllChoices?displayLogic=0","Type":"Dynamic","Description":"Displayed Choices"},"DynamicChoicesData":[],"RecodeValues":{"x1":"0","x5":"1","x6":"2","x7":"3"},"DataVisibility":{"Private":false,"Hidden":false},"NextChoiceId":1,"NextAnswerId":1}},{"SurveyID":"SV_bdByXydulCoImrP","Element":"SQ","PrimaryAttribute":"QID25","SecondaryAttribute":"Students were asked to provide formal or informal\u00a0feedback on course activities and content prior..","TertiaryAttribute":null,"Payload":{"QuestionText":"<span style=\"font-size: 16px;\">Students were asked to provide formal or informal&nbsp;feedback on course activities and content <u>prior to<\/u> the end of the semester evaluation:<\/span>","DefaultChoices":false,"DataExportTag":"Q27","QuestionType":"MC","Selector":"SAHR","SubSelector":"TX","Configuration":{"QuestionDescriptionOption":"UseText","LabelPosition":"BELOW"},"QuestionDescription":"Students were asked to provide formal or informal\u00a0feedback on course activities and content prior...","Choices":{"12":{"Display":"<span style=\"font-size:13px;\">zero times<\/span>"},"13":{"Display":"<span style=\"font-size:13px;\">1 time<br>during the semester<\/span>"},"14":{"Display":"<span style=\"font-size:13px;\">2 times<br>during the semester<\/span>"},"15":{"Display":"<span style=\"font-size:13px;\">3 times<br>during the semester<\/span>"},"16":{"Display":"<span style=\"font-size:13px;\">4 times<br>during the semester<\/span>"},"17":{"Display":"<span style=\"font-size:13px;\">5 times<br>during the semester<\/span>"},"18":{"Display":"<span style=\"font-size:13px;\">6 or more times<br>during the semester<\/span>"}},"ChoiceOrder":["12","13","14","15","16","17","18"],"Validation":{"Settings":{"ForceResponse":"OFF","ForceResponseType":"ON","Type":"None"}},"GradingData":[],"Language":[],"QuestionID":"QID25","DynamicChoicesData":[],"RecodeValues":{"12":"0","13":"1","14":"2","15":"3","16":"4","17":"5","18":"6"}}},{"SurveyID":"SV_bdByXydulCoImrP","Element":"SQ","PrimaryAttribute":"QID35","SecondaryAttribute":"Students were asked to summarize, interpret, or analyze data using mathematical or computational...","TertiaryAttribute":null,"Payload":{"QuestionText":"<span style=\"font-size: 16px;\">Students were asked to summarize, interpret, or analyze data using mathematical or computational procedures approximately:<\/span>","DefaultChoices":false,"DataExportTag":"Q22","QuestionType":"MC","Selector":"SAHR","SubSelector":"TX","Configuration":{"QuestionDescriptionOption":"UseText","LabelPosition":"BELOW"},"QuestionDescription":"Students were asked to summarize, interpret, or analyze data using mathematical or computational...","Choices":[],"ChoiceOrder":[],"Validation":{"Settings":{"ForceResponse":"OFF","ForceResponseType":"ON","Type":"None"}},"GradingData":[],"Language":[],"QuestionID":"QID35","DynamicChoices":{"DynamicType":"ChoiceGroup","Locator":"q:\/\/QID15\/ChoiceGroup\/AllChoices?displayLogic=0","Type":"Dynamic","Description":"All Choices - Displayed & Hidden"},"DynamicChoicesData":[],"RecodeValues":{"x1":"0","x5":"1","x6":"2","x7":"3"},"DataVisibility":{"Private":false,"Hidden":false},"NextChoiceId":1,"NextAnswerId":1}},{"SurveyID":"SV_bdByXydulCoImrP","Element":"SQ","PrimaryAttribute":"QID38","SecondaryAttribute":"Students were asked to use data to make decisions or defend scientific conclusions approximately:","TertiaryAttribute":null,"Payload":{"QuestionText":"<span style=\"font-size: 16px;\">Students were asked to use data to make decisions or defend scientific conclusions approximately:<\/span>","DefaultChoices":false,"DataExportTag":"Q25","QuestionType":"MC","Selector":"SAHR","SubSelector":"TX","Configuration":{"QuestionDescriptionOption":"UseText","LabelPosition":"BELOW"},"QuestionDescription":"Students were asked to use data to make decisions or defend scientific conclusions approximately:","Choices":[],"ChoiceOrder":[],"Validation":{"Settings":{"ForceResponse":"OFF","ForceResponseType":"ON","Type":"None"}},"GradingData":[],"Language":[],"QuestionID":"QID38","DynamicChoices":{"DynamicType":"ChoiceGroup","Locator":"q:\/\/QID15\/ChoiceGroup\/AllChoices?displayLogic=0","Type":"Dynamic","Description":"All Choices - Displayed & Hidden"},"DynamicChoicesData":[],"RecodeValues":{"x1":"0","x5":"1","x6":"2","x7":"3"},"DataVisibility":{"Private":false,"Hidden":false},"NextChoiceId":1,"NextAnswerId":1}},{"SurveyID":"SV_bdByXydulCoImrP","Element":"SQ","PrimaryAttribute":"QID55","SecondaryAttribute":"Students were asked to work in groups of two or more for any portion of this course:","TertiaryAttribute":null,"Payload":{"QuestionText":"<span style=\"font-size: 16px;\">Students were asked to <strong>work in groups<\/strong> of two or more for any portion of this course:<\/span>","DefaultChoices":false,"DataExportTag":"Q7","QuestionType":"MC","Selector":"SAHR","SubSelector":"TX","Configuration":{"QuestionDescriptionOption":"UseText","LabelPosition":"BELOW"},"QuestionDescription":"Students were asked to work in groups of two or more for any portion of this course:","Choices":{"1":{"Display":"<span style=\"font-size:13px;\">yes<\/span>"},"2":{"Display":"<span style=\"font-size:13px;\">no<\/span>"}},"ChoiceOrder":[1,2],"Validation":{"Settings":{"ForceResponse":"OFF","ForceResponseType":"ON","Type":"None"}},"GradingData":[],"Language":[],"QuestionID":"QID55","RecodeValues":{"1":"1","2":"0"},"DataVisibility":{"Private":false,"Hidden":false},"NextChoiceId":3,"NextAnswerId":1}},{"SurveyID":"SV_bdByXydulCoImrP","Element":"SQ","PrimaryAttribute":"QID24","SecondaryAttribute":"Students were encouraged to\u00a0consider the ideas and contributions of a diversity of researchers an..","TertiaryAttribute":null,"Payload":{"QuestionText":"<span style=\"font-size: 16px;\">Students were encouraged to&nbsp;consider the <u>ideas and contributions<\/u> of a diversity of <u>researchers and other people<\/u> involved in science.<\/span>","DefaultChoices":false,"DataExportTag":"Q15","QuestionID":"QID24","QuestionType":"MC","Selector":"SAHR","SubSelector":"TX","Configuration":{"QuestionDescriptionOption":"UseText","LabelPosition":"BELOW"},"QuestionDescription":"Students were encouraged to\u00a0consider the ideas and contributions of a diversity of researchers an...","Choices":[],"ChoiceOrder":[],"Validation":{"Settings":{"ForceResponse":"OFF","ForceResponseType":"ON","Type":"None"}},"GradingData":[],"Language":[],"DynamicChoicesData":[],"DynamicChoices":{"DynamicType":"ChoiceGroup","Locator":"q:\/\/QID23\/ChoiceGroup\/AllChoices?displayLogic=0","Type":"Dynamic","Description":"All Choices - Displayed & Hidden"},"RecodeValues":{"x7":"0","x8":"1","x9":"2","x10":"3","x11":"4","x12":"5","x13":"6"},"DataVisibility":{"Private":false,"Hidden":false},"NextChoiceId":1,"NextAnswerId":1}},{"SurveyID":"SV_bdByXydulCoImrP","Element":"SQ","PrimaryAttribute":"QID22","SecondaryAttribute":"Students were provided with examples or explanations showing that\u00a0course concepts are applicable...","TertiaryAttribute":null,"Payload":{"QuestionText":"<span style=\"font-size: 16px;\">Students were provided with examples or explanations showing that&nbsp;course concepts are applicable to everyday human experiences or real-life applications approximately:<\/span>","DefaultChoices":false,"DataExportTag":"Q29","QuestionType":"MC","Selector":"SAHR","SubSelector":"TX","Configuration":{"QuestionDescriptionOption":"UseText","LabelPosition":"BELOW"},"QuestionDescription":"Students were provided with examples or explanations showing that\u00a0course concepts are applicable...","Choices":[],"ChoiceOrder":[],"Validation":{"Settings":{"ForceResponse":"OFF","ForceResponseType":"ON","Type":"None"}},"GradingData":[],"Language":[],"QuestionID":"QID22","DynamicChoices":{"DynamicType":"ChoiceGroup","Locator":"q:\/\/QID15\/ChoiceGroup\/AllChoices?displayLogic=0","Type":"Dynamic","Description":"Displayed Choices"},"DynamicChoicesData":[],"RecodeValues":{"x1":"0","x5":"1","x6":"2","x7":"3"},"DataVisibility":{"Private":false,"Hidden":false},"NextChoiceId":1,"NextAnswerId":1}},{"SurveyID":"SV_bdByXydulCoImrP","Element":"SQ","PrimaryAttribute":"QID48","SecondaryAttribute":"Students were provided with opportunities or suggestions to reflect on whether\u00a0their study habits..","TertiaryAttribute":null,"Payload":{"QuestionText":"<span style=\"font-size: 16px;\">Students were provided with opportunities or suggestions to reflect on whether&nbsp;their study habits were effective for learning approximately:<\/span>","DefaultChoices":false,"DataExportTag":"Q35","QuestionType":"MC","Selector":"SAHR","SubSelector":"TX","Configuration":{"QuestionDescriptionOption":"UseText","LabelPosition":"BELOW"},"QuestionDescription":"Students were provided with opportunities or suggestions to reflect on whether\u00a0their study habits...","Choices":[],"ChoiceOrder":[],"Validation":{"Settings":{"ForceResponse":"OFF","ForceResponseType":"ON","Type":"None"}},"GradingData":[],"Language":[],"QuestionID":"QID48","DynamicChoices":{"DynamicType":"ChoiceGroup","Locator":"q:\/\/QID15\/ChoiceGroup\/AllChoices?displayLogic=0","Type":"Dynamic","Description":"Displayed Choices"},"DynamicChoicesData":[],"RecodeValues":{"x1":"0","x5":"1","x6":"2","x7":"3"},"DataVisibility":{"Private":false,"Hidden":false},"NextChoiceId":1,"NextAnswerId":1}},{"SurveyID":"SV_bdByXydulCoImrP","Element":"SQ","PrimaryAttribute":"QID47","SecondaryAttribute":"Students were provided with\u00a0opportunities or suggestions\u00a0to reflect on their\u00a0problem-solving stra","TertiaryAttribute":null,"Payload":{"QuestionText":"<span style=\"font-size: 16px;\">Students were provided with&nbsp;opportunities or suggestions&nbsp;to reflect on their&nbsp;problem-solving strategies&nbsp;approximately:<\/span>","DefaultChoices":false,"DataExportTag":"Q36","QuestionType":"MC","Selector":"SAHR","SubSelector":"TX","Configuration":{"QuestionDescriptionOption":"UseText","LabelPosition":"BELOW"},"QuestionDescription":"Students were provided with\u00a0opportunities or suggestions\u00a0to reflect on their\u00a0problem-solving stra...","Choices":[],"ChoiceOrder":[],"Validation":{"Settings":{"ForceResponse":"OFF","ForceResponseType":"ON","Type":"None"}},"GradingData":[],"Language":[],"QuestionID":"QID47","DynamicChoices":{"DynamicType":"ChoiceGroup","Locator":"q:\/\/QID15\/ChoiceGroup\/AllChoices?displayLogic=0","Type":"Dynamic","Description":"Displayed Choices"},"DynamicChoicesData":[],"RecodeValues":{"x1":"0","x5":"1","x6":"2","x7":"3"},"DataVisibility":{"Private":false,"Hidden":false},"NextChoiceId":1,"NextAnswerId":1}},{"SurveyID":"SV_bdByXydulCoImrP","Element":"SQ","PrimaryAttribute":"QID40","SecondaryAttribute":"Students were\u00a0asked to interpret or critique scientific literature or media articles related to s..","TertiaryAttribute":null,"Payload":{"QuestionText":"<span style=\"font-size: 16px;\">Students were&nbsp;asked to interpret or critique scientific literature <u>or<\/u> media articles related to science approximately:<\/span>","DefaultChoices":false,"DataExportTag":"Q27","QuestionType":"MC","Selector":"SAHR","SubSelector":"TX","Configuration":{"QuestionDescriptionOption":"UseText","LabelPosition":"BELOW"},"QuestionDescription":"Students were\u00a0asked to interpret or critique scientific literature or media articles related to s...","Choices":[],"ChoiceOrder":[],"Validation":{"Settings":{"ForceResponse":"OFF","ForceResponseType":"ON","Type":"None"}},"GradingData":[],"Language":[],"QuestionID":"QID40","DynamicChoices":{"DynamicType":"ChoiceGroup","Locator":"q:\/\/QID15\/ChoiceGroup\/AllChoices?displayLogic=0","Type":"Dynamic","Description":"All Choices - Displayed & Hidden"},"DynamicChoicesData":[],"RecodeValues":{"x1":"0","x5":"1","x6":"2","x7":"3"},"DataVisibility":{"Private":false,"Hidden":false},"NextChoiceId":1,"NextAnswerId":1}},{"SurveyID":"SV_bdByXydulCoImrP","Element":"SQ","PrimaryAttribute":"QID46","SecondaryAttribute":"Students\u00a0were asked\u00a0to practice knowledge or skills from other\u00a0Science, Technology, Engineering,.","TertiaryAttribute":null,"Payload":{"QuestionText":"<span style=\"font-size: 16px;\">Students&nbsp;were asked&nbsp;to practice knowledge or skills from other&nbsp;<u>S<\/u>cience, <u>T<\/u>echnology, <u>E<\/u>ngineering, and <u>M<\/u>ath (STEM) subjects when&nbsp;answering questions or completing class activities.<\/span>","DefaultChoices":false,"DataExportTag":"Q32","QuestionType":"MC","Selector":"SAHR","SubSelector":"TX","Configuration":{"QuestionDescriptionOption":"UseText","LabelPosition":"BELOW"},"QuestionDescription":"Students\u00a0were asked\u00a0to practice knowledge or skills from other\u00a0Science, Technology, Engineering,...","Choices":[],"ChoiceOrder":[],"Validation":{"Settings":{"ForceResponse":"OFF","ForceResponseType":"ON","Type":"None"}},"GradingData":[],"Language":[],"QuestionID":"QID46","DynamicChoicesData":[],"DynamicChoices":{"DynamicType":"ChoiceGroup","Locator":"q:\/\/QID15\/ChoiceGroup\/AllChoices?displayLogic=0","Type":"Dynamic","Description":"All Choices - Displayed & Hidden"},"RecodeValues":{"x1":"0","x5":"1","x6":"2","x7":"3"},"DataVisibility":{"Private":false,"Hidden":false},"NextChoiceId":1,"NextAnswerId":1}},{"SurveyID":"SV_bdByXydulCoImrP","Element":"SQ","PrimaryAttribute":"QID57","SecondaryAttribute":"Thank you for taking the time to complete the Measurement Instrument for Scientific Teaching - Ob...","TertiaryAttribute":null,"Payload":{"QuestionText":"<p><span style=\"font-size: 16px;\"><span style=\"font-size: 16px;\">Thank you for taking the time to complete the Measurement Instrument for Scientific Teaching - Observable (MISTO).<\/span><\/span><\/p>\n\n<p><span style=\"font-size: 16px;\">&nbsp;<\/span><\/p>\n\n<p><span style=\"font-size: 16px;\"><span style=\"font-size: 16px;\"><strong><em>Please answer the questions based only on the lecture portion of the&nbsp;course in which you received this survey. Throughout the survey, please provide your best estimate of the frequencies of teaching practices that occurred as part of this course during the week your instructor has specified. Do not include practices from laboratories or&nbsp;<\/em><\/strong><strong><em>recitation\/<\/em><\/strong><strong><em>discussion sections in your responses. <\/em><\/strong><\/span><\/span><\/p><p>&nbsp;<\/p>\n\n<p><span style=\"font-size: 16px;\"><span style=\"font-size: 16px;\"><span style=\"font-size: 16px;\">If you exit the survey or lose your connection, your responses will be saved and you can return to the survey&nbsp;using the same device.<\/span><\/span><\/span><\/p>","DefaultChoices":false,"DataExportTag":"intro","QuestionType":"DB","Selector":"TB","Configuration":{"QuestionDescriptionOption":"UseText"},"QuestionDescription":"Thank you for taking the time to complete the Measurement Instrument for Scientific Teaching - Ob...","ChoiceOrder":[],"Validation":{"Settings":{"Type":"None"}},"GradingData":[],"Language":[],"QuestionID":"QID57","PrivateData":false,"DataVisibility":{"Private":false,"Hidden":false},"NextChoiceId":1,"NextAnswerId":1}},{"SurveyID":"SV_bdByXydulCoImrP","Element":"SQ","PrimaryAttribute":"QID18","SecondaryAttribute":"The instructor used a\u00a0strategy, such as\u00a0assigning roles, to\u00a0promote the participation of each gro","TertiaryAttribute":null,"Payload":{"QuestionText":"<span style=\"font-size: 16px;\">The instructor used a&nbsp;strategy, such as&nbsp;assigning roles, to&nbsp;promote the participation of each group member during in-class&nbsp;group activites:<\/span>","DefaultChoices":false,"DataExportTag":"Q10","QuestionID":"QID18","QuestionType":"MC","Selector":"SAHR","SubSelector":"TX","Configuration":{"QuestionDescriptionOption":"UseText","LabelPosition":"BELOW"},"QuestionDescription":"The instructor used a\u00a0strategy, such as\u00a0assigning roles, to\u00a0promote the participation of each gro...","Choices":{"14":{"Display":"<span style=\"font-size:13px;\">not at all<\/span>"},"16":{"Display":"<span style=\"font-size:13px;\">less than half of the time<\/span>"},"17":{"Display":"<span style=\"font-size:13px;\">half the time<\/span>"},"18":{"Display":"<span style=\"font-size:13px;\">more than half of the time<\/span>"},"20":{"Display":"<span style=\"font-size:13px;\">always<\/span>"}},"ChoiceOrder":["14","16","17","18","20"],"Validation":{"Settings":{"ForceResponse":"OFF","ForceResponseType":"ON","Type":"None"}},"GradingData":[],"Language":[],"RecodeValues":{"14":"0","16":"1","17":"2","18":"3","20":"4"},"DataVisibility":{"Private":false,"Hidden":false},"NextChoiceId":21,"NextAnswerId":1}},{"SurveyID":"SV_bdByXydulCoImrP","Element":"SQ","PrimaryAttribute":"QID29","SecondaryAttribute":"The instructor was generally aware of instances when a concept was not understood by the majority...","TertiaryAttribute":null,"Payload":{"QuestionText":"<span style=\"font-size: 16px;\">The instructor was generally aware of instances when a concept was not understood by the majority of students prior to an exam:<\/span>","DefaultChoices":false,"DataExportTag":"Q17","QuestionID":"QID29","QuestionType":"MC","Selector":"SAHR","SubSelector":"TX","Configuration":{"QuestionDescriptionOption":"UseText","LabelPosition":"BELOW"},"QuestionDescription":"The instructor was generally aware of instances when a concept was not understood by the majority...","Choices":{"1":{"Display":"<span style=\"font-size:13px;\">not at all<\/span>"},"3":{"Display":"<span style=\"font-size:13px;\">less than half<br>of the time<\/span>"},"4":{"Display":"<span style=\"font-size:13px;\">half<br>of the time<\/span>"},"5":{"Display":"<span style=\"font-size:13px;\">more than half<br>of the time<\/span>"},"7":{"Display":"<span style=\"font-size:13px;\">always<\/span>"}},"ChoiceOrder":["1","3","4","5","7"],"Validation":{"Settings":{"ForceResponse":"OFF","ForceResponseType":"ON","Type":"None"}},"GradingData":[],"Language":[],"DynamicChoicesData":[],"RecodeValues":{"1":"0","3":"1","4":"2","5":"3","7":"4"},"DataVisibility":{"Private":false,"Hidden":false},"NextChoiceId":8,"NextAnswerId":1}},{"SurveyID":"SV_bdByXydulCoImrP","Element":"SQ","PrimaryAttribute":"QID21","SecondaryAttribute":"To what extent do you agree with the following statement: \u00a0 Students were encouraged to respond t..","TertiaryAttribute":null,"Payload":{"QuestionText":"<p><span style=\"font-size: 16px;\"><span style=\"font-size: 16px;\">To what extent do you agree with the following statement:<\/span><\/span><\/p>\n\n<p>&nbsp;<\/p>\n\n<p><span style=\"font-size: 16px;\">Students were encouraged to respond to classmates' ideas <u>during whole-class discussions<\/u>:<\/span><\/p>","DefaultChoices":false,"DataExportTag":"Q13","QuestionID":"QID21","QuestionType":"MC","Selector":"SAHR","SubSelector":"TX","Configuration":{"QuestionDescriptionOption":"UseText","LabelPosition":"BELOW"},"QuestionDescription":"To what extent do you agree with the following statement: \u00a0 Students were encouraged to respond t...","Choices":{"57":{"Display":"<span style=\"font-size: 13px;\">this course did not include whole-class discussions<\/span>"},"58":{"Display":"<span style=\"font-size: 13px;\">strongly disagree<\/span>"},"59":{"Display":"<span style=\"font-size: 13px;\">disagree<\/span>"},"60":{"Display":"<span style=\"font-size: 13px;\">somewhat disagree<\/span>"},"61":{"Display":"<span style=\"font-size: 13px;\">somewhat agree<\/span>"},"62":{"Display":"<span style=\"font-size: 13px;\">agree<\/span>"},"63":{"Display":"<span style=\"font-size: 13px;\">strongly agree<\/span>"}},"ChoiceOrder":["57","58","59","60","61","62","63"],"Validation":{"Settings":{"ForceResponse":"OFF","ForceResponseType":"ON","Type":"None"}},"GradingData":[],"Language":[],"RecodeValues":{"57":"0","58":"1","59":"2","60":"3","61":"4","62":"5","63":"6"},"DataVisibility":{"Private":false,"Hidden":false},"NextChoiceId":64,"NextAnswerId":1}},{"SurveyID":"SV_bdByXydulCoImrP","Element":"SQ","PrimaryAttribute":"QID27","SecondaryAttribute":"To what extent do you agree with the following statement: \u00a0 Students\u00a0stated interests or asked\u00a0qu","TertiaryAttribute":null,"Payload":{"QuestionText":"<p><span style=\"font-size: 16px;\"><span style=\"font-size: 16px;\">To what extent do you agree with the following statement:<\/span><\/span><\/p>\n\n<p>&nbsp;<\/p>\n\n<p><span style=\"font-size: 16px;\">Students&nbsp;stated interests or asked&nbsp;questions related to&nbsp;the topic at hand during class.<\/span><\/p>","DefaultChoices":false,"DataExportTag":"Q16","QuestionType":"MC","Selector":"SAHR","SubSelector":"TX","Configuration":{"QuestionDescriptionOption":"UseText","LabelPosition":"BELOW"},"QuestionDescription":"To what extent do you agree with the following statement: \u00a0 Students\u00a0stated interests or asked\u00a0qu...","Choices":{"23":{"Display":"<span style=\"font-size: 13px;\">strongly disagree<\/span>"},"24":{"Display":"<span style=\"font-size: 13px;\">disagree<\/span>"},"25":{"Display":"<span style=\"font-size: 13px;\">somewhat disagree<\/span>"},"26":{"Display":"<span style=\"font-size: 13px;\">somewhat agree<\/span>"},"27":{"Display":"<span style=\"font-size: 13px;\">agree<\/span>"},"28":{"Display":"<span style=\"font-size: 13px;\">strongly agree<\/span>"}},"ChoiceOrder":["23","24","25","26","27","28"],"Validation":{"Settings":{"ForceResponse":"OFF","ForceResponseType":"ON","Type":"None"}},"GradingData":[],"Language":[],"QuestionID":"QID27","DynamicChoicesData":[],"RecodeValues":{"23":"1","24":"2","25":"3","26":"4","27":"5","28":"6"},"DataVisibility":{"Private":false,"Hidden":false},"NextChoiceId":29,"NextAnswerId":1}},{"SurveyID":"SV_bdByXydulCoImrP","Element":"SQ","PrimaryAttribute":"QID142","SecondaryAttribute":"To what extent do you agree with the following statement: \u00a0 The instructor was sensitive to socia..","TertiaryAttribute":null,"Payload":{"QuestionText":"<p><span style=\"font-size: 16px;\"><span style=\"font-size: 16px;\"><span style=\"font-size: 16px;\">To what extent do you agree with the following statement:<\/span><\/span><\/span><\/p><p><span style=\"font-size: 16px;\"><\/span>&nbsp;<\/p><p><span style=\"font-size: 16px;\">The instructor was sensitive to socially controversial issues.<\/span><\/p>","DataExportTag":"Q26","QuestionType":"MC","Selector":"SAHR","SubSelector":"TX","Configuration":{"QuestionDescriptionOption":"UseText","LabelPosition":"BELOW"},"QuestionDescription":"To what extent do you agree with the following statement: \u00a0 The instructor was sensitive to socia...","Choices":{"9":{"Display":"<span style=\"font-size:13px;\">strongly disagree<\/span>"},"10":{"Display":"<span style=\"font-size: 13px;\">disagree<\/span>"},"11":{"Display":"<span style=\"font-size: 13px;\">somewhat disagree<\/span>"},"12":{"Display":"<span style=\"font-size: 13px;\">somewhat agree<\/span>"},"13":{"Display":"<span style=\"font-size: 13px;\">agree<\/span>"},"14":{"Display":"<span style=\"font-size: 13px;\">strongly agree<\/span>"}},"ChoiceOrder":["9","10","11","12","13","14"],"Validation":{"Settings":{"ForceResponse":"OFF","ForceResponseType":"ON","Type":"None"}},"Language":[],"QuestionID":"QID142","DefaultChoices":false,"GradingData":[],"RecodeValues":{"9":"1","10":"2","11":"3","12":"4","13":"5","14":"6"}}},{"SurveyID":"SV_bdByXydulCoImrP","Element":"SQ","PrimaryAttribute":"QID30","SecondaryAttribute":"When it became clear that the class did not understand a concept, students were provided with fol...","TertiaryAttribute":null,"Payload":{"QuestionText":"<span style=\"font-size: 16px;\">When it became clear that the class did not understand a concept, students were provided with follow-up discussion, activities, or resources.<\/span>","DefaultChoices":false,"DataExportTag":"Q18","QuestionType":"MC","Selector":"SAHR","SubSelector":"TX","Configuration":{"QuestionDescriptionOption":"UseText","LabelPosition":"BELOW"},"QuestionDescription":"When it became clear that the class did not understand a concept, students were provided with fol...","Choices":{"1":{"Display":"<span style=\"font-size:13px;\">not part of this course<\/span>"},"4":{"Display":"<span style=\"font-size:13px;\">less than half<br>of the time<\/span>"},"5":{"Display":"<span style=\"font-size:13px;\">half<br>of the time<\/span>"},"6":{"Display":"<span style=\"font-size:13px;\">more than half<br>of the time<\/span>"},"7":{"Display":"<span style=\"font-size:13px;\">most<br>of the time<\/span>"},"8":{"Display":"<span style=\"font-size:13px;\">always<\/span>"}},"ChoiceOrder":["1","4","5","6","7","8"],"Validation":{"Settings":{"ForceResponse":"OFF","ForceResponseType":"ON","Type":"None"}},"GradingData":[],"Language":[],"QuestionID":"QID30","DynamicChoicesData":[],"RecodeValues":{"1":"0","4":"1","5":"2","6":"3","7":"4","8":"5"},"DataVisibility":{"Private":false,"Hidden":false},"NextChoiceId":9,"NextAnswerId":1}}]}
